# Supplementary material for: Status and contents of physical activity recommendations in European Union countries: a systematic comparative analysis
Source: PubMed Central journal article supplement — BMJ Open. 2020 Feb 20;10(2):e034045. doi: 10.1136/bmjopen-2019-034045 (PMC7044960; doi:10.1136/bmjopen-2019-034045), 2020-02-20
Supplement: bmjopen-2019-034045.draft_revisions.pdf [file bmjopen-2019-034045.draft_revisions.pdf]

# BMJ Open

BMJ Open is committed to open peer review. As part of this commitment we make the peer review history of every article we publish publicly available.

When an article is published we post the peer reviewers' comments and the authors' responses online. We also post the versions of the paper that were used during peer review. These are the versions that the peer review comments apply to.

The versions of the paper that follow are the versions that were submitted during the peer review process. They are not the versions of record or the final published versions. They should not be cited or distributed as the published version of this manuscript.

BMJ Open is an open access journal and the full, final, typeset and author-corrected version of record of the manuscript is available on our site with no access controls, subscription charges or pay-per-view fees (<http://bmjopen.bmj.com>).

If you have any questions on BMJ Open's open peer review process please email [info.bmjopen@bmj.com](mailto:info.bmjopen@bmj.com)

# BMJ Open

## Physical Activity Recommendations in European Union Countries: An update

|                               |                                                                                                                                                                                                                                                                                                                                                                                                                                                                                                                                                                                                                                                                      |
|-------------------------------|----------------------------------------------------------------------------------------------------------------------------------------------------------------------------------------------------------------------------------------------------------------------------------------------------------------------------------------------------------------------------------------------------------------------------------------------------------------------------------------------------------------------------------------------------------------------------------------------------------------------------------------------------------------------|
| Journal:                      | <i>BMJ Open</i>                                                                                                                                                                                                                                                                                                                                                                                                                                                                                                                                                                                                                                                      |
| Manuscript ID                 | bmjopen-2019-034045                                                                                                                                                                                                                                                                                                                                                                                                                                                                                                                                                                                                                                                  |
| Article Type:                 | Original research                                                                                                                                                                                                                                                                                                                                                                                                                                                                                                                                                                                                                                                    |
| Date Submitted by the Author: | 03-Sep-2019                                                                                                                                                                                                                                                                                                                                                                                                                                                                                                                                                                                                                                                          |
| Complete List of Authors:     | Gelius, Peter; FAU, Department of Sport Science and Sport<br>Tcymbal, Antonina; FAU, Department of Sport Science and Sport<br>Abu-Omar, Karim ; FAU, Department of Sport Science and Sport<br>Mendes, Romeu; Universidade do Porto Instituto de Saúde Pública<br>Tribuzi Morais, Sara; Universidade do Porto, Faculdade de Desporto<br>Whiting, Stephen; World Health Organization Regional Office for Europe,<br>Division of Noncommunicable Diseases and Promoting Health through<br>the Life-course<br>Breda, Joao; World Health Organization Regional Office for Europe,<br>Division of Noncommunicable Diseases and Promoting Health through<br>the Life-course |
| Keywords:                     | Physical Activity, PUBLIC HEALTH, Health policy < HEALTH SERVICES<br>ADMINISTRATION & MANAGEMENT, National recommendations                                                                                                                                                                                                                                                                                                                                                                                                                                                                                                                                           |
|                               |                                                                                                                                                                                                                                                                                                                                                                                                                                                                                                                                                                                                                                                                      |

SCHOLARONE™  
Manuscripts

# Physical Activity Recommendations in European Union Countries: An update

*Peter Gelius<sup>1</sup>, Antonina Tcymbal<sup>1</sup>, Karim Abu-Omar<sup>1</sup>, Romeu Mendes<sup>2</sup>,*

*Sara Tribuzi Morais<sup>3</sup>, Stephen Whiting<sup>4</sup>, & João Rodrigues da Silva Breda<sup>4</sup>*

<sup>1</sup>FAU Erlangen-Nürnberg, Department of Sport Science and Sport

<sup>2</sup>Universidade de Porto, Instituto de Saúde Pública

<sup>3</sup>Universidade de Porto, Faculdade de Desporto

<sup>4</sup>World Health Organization Regional Office for Europe, Division of Noncommunicable Diseases and Promoting Health through the Life-course

## Abstract

**Objectives:** We analyzed the information on current national physical activity recommendations in all EU Member States provided by governments in a joint EU/WHO survey on the implementation status of the EU Council Recommendation on Health-Enhancing Physical Activity across Sectors.

**Design:** Cross-sectional survey.

**Participants:** The representatives of the 28 EU Member State governments to the EU Physical Activity Focal Point Network.

**Outcome measures:** National recommendations on (a) minimum frequency, duration, intensity and lengths of bouts of physical activity, on (b) preventing inactivity or sedentary behavior, and (c) further recommendations for additional health benefits, obesity prevention, and specific types of activity.

**Results:** An official document could be located for 23 of the 28 EU Member States, while four are currently developing recommendations. For children and adolescents, most countries follow the 2010 WHO Global Recommendations for Physical Activity, but there are notable differences in the delimitation of age groups. 14 countries also followed WHO in their recommendations for adults, and 11 countries have additional advice on avoiding inactivity and sitting among adults. 18 Member States have recommendations for older adults, twelve of which follow WHO. Thirteen countries also address at least one special population (e.g. pregnant women, people with disabilities, and people with chronic diseases), but the level of detail varies substantially between countries.

1  
2  
3 **Conclusions:** The large majority of EU Member States either has physical activity  
4  
5 recommendations in place or is in the process of developing them. There is a general  
6  
7 tendency to use the WHO Global Recommendations as a basis, with the greatest  
8  
9 variation observable for children and adolescents. Comparing results to a previous  
10  
11 round of data collection shows that the number of EU countries with physical activity  
12  
13 recommendations is increasing and that both special groups and sedentary behavior  
14  
15 have become more important in recent years.  
16  
17  
18  
19  
20  
21  
22  
23  
24  
25  
26  
27  
28  
29  
30  
31  
32  
33  
34  
35  
36  
37  
38  
39  
40  
41  
42  
43  
44  
45  
46  
47  
48  
49  
50  
51  
52  
53  
54  
55  
56  
57  
58  
59  
60

**Strengths and limitations of this study:**

- This study provides a complete overview of existing physical activity recommendations in EU Member States.
- It builds on information obtained directly from national governments using data gathered jointly by the European Commission and the WHO Regional Office for Europe.
- By comparing the data with an earlier survey using the same instrument, this study also allows for monitoring the progress made in this area of health promotion policy in recent years.
- Limitations include a restriction to documents published before April 2018, difficulties in identifying and obtaining all relevant documents, and the language barrier involved in analyzing data in 21 different languages.

## Introduction

Global efforts to promote physical activity (PA) have intensified in recent years, culminating in key World Health Organization (WHO) publications such as the 2004 WHO Global Strategy on Diet, PA and Health <sup>1</sup>, the PA Strategy for the WHO European Region 2016–2025 <sup>2</sup>, and the 2018 Global Action Plan on PA <sup>3</sup>. Common advice found in all these documents is for Member States to develop their own national recommendations on how active their population should be in order to promote health and prevent disease, thus mirroring WHO's own Global Recommendations on PA for Health <sup>4</sup>. The European Union (EU) has also been increasingly active in the field, with efforts building upon the 2008 EU PA Guidelines <sup>5</sup> and the 2013 EU Council Recommendations for PA <sup>6</sup>. Like WHO, the EU encourages Member States to publish national PA recommendations for health.

While there is only limited evidence that such national recommendations can, by themselves, increase the share of individuals who meet sufficient levels of PA <sup>7</sup>, the process of developing them may serve as a starting point for putting the topic of PA promotion on the national agenda <sup>8</sup>.

Given both their political relevance and their potential to spark new policy, it is important to monitor whether national governments are making progress in developing national PA recommendations. Based on data collected in 2011, Kahlmeier et al. <sup>9</sup> provided an overview of existing national PA recommendations in the WHO European Region. They found that 21 out of the 53 nations in the entire Region and 16 out of the 28 EU Member States had such recommendations in place. Some years later, Breda et al. <sup>10</sup> analyzed data collected in 2015 by the European Commission and the WHO

1  
2  
3 Regional Office for Europe to monitor the progress of implementation of the Council  
4 Recommendation on HEPA across Sectors<sup>6</sup> and to produce the EU/WHO PA Country  
5 Factsheets for the EU Member States of the WHO European Region<sup>11</sup>. They noted that 19  
6 of the 27 participating EU countries had reported national PA recommendations.  
7  
8 However, a more detailed analysis of these recommendations was beyond the scope of  
9  
10 this overview article.  
11  
12  
13  
14  
15  
16  
17  
18

19 As part of a regular update of this information<sup>11</sup>, WHO and the EC collected new  
20 information on national PA recommendations in 2018. These data provide a unique  
21 opportunity not only to revise the overview of existing recommendations in the EU but  
22 also for a detailed comparison of target groups, age bracket definitions, and  
23 recommended amounts and types of PA across nations. This information may be useful  
24 both to further monitor the progress of recommendation development in the EU and as  
25 a potential source of inspiration for other countries in the WHO European Region.  
26  
27  
28  
29  
30  
31  
32  
33  
34  
35  
36  
37  
38  
39

## 40 **Methods**

### 41 *Data collection*

42 Information about national PA recommendations was obtained from the 2018 joint  
43 survey by the EC and WHO Europe, which employed a questionnaire covering all 23  
44 indicators of the Council Recommendation on HEPA across Sectors. Indicator 1 is  
45 dedicated exclusively to national PA recommendations. Specific items included the  
46 development status of national PA recommendations (e.g. not planned, under  
47 development, formally adopted), the age brackets covered (children and adolescents,  
48 adults or older adults), special populations addressed (e.g. children < 5 years, frail  
49  
50  
51  
52  
53  
54  
55  
56  
57  
58  
59  
60



1  
2  
3 people or those aged  $\geq 85$  years, pregnant or breastfeeding women, people with  
4 disabilities or people with chronic diseases), and links to relevant documents <sup>11</sup>.  
5  
6  
7  
8  
9

10 The questionnaire was sent to the EU Physical Activity Focal Points in all 28 EU Member  
11 States in January 2018. Focal Points are PA experts officially nominated by their  
12 governments to support data collection who usually work in national ministries of  
13 health, ministries of sport, or related national agencies. They were asked to liaise with  
14 relevant national institutions and stakeholders to fill out the questionnaire within 3  
15 months. All 28 Focal Points completed the questionnaire. WHO reviewed the responses  
16 to ensure data quality, obtained additional information and clarification where  
17 necessary, and prepared draft summaries. After a final review by the Member States, the  
18 collated information was published in the form of updated PA Country Factsheets <sup>11</sup>.  
19  
20  
21  
22  
23  
24  
25  
26  
27  
28  
29  
30  
31  
32

### 33 *Verification of information on national physical activity recommendation*

34 For this article, we retrieved and reviewed the answers for Indicator 1 of the survey  
35 from the original dataset. We followed the links to national PA recommendations  
36 provided by countries and downloaded the official documents. In cases where the link  
37 was missing or broken, an additional search was conducted on the internet. Where this  
38 still yielded no results, fellow academics from the field of PA in the respective nations  
39 were contacted to in order to obtain the document. The contents of recommendations in  
40 languages other than English or German were translated online via Google Translate.  
41 Translations were verified against the original versions by expert native speakers to  
42 confirm their factual correctness.  
43  
44  
45  
46  
47  
48  
49  
50  
51  
52  
53  
54  
55  
56  
57  
58  
59  
60

### *Data analysis*

The following information were extracted from national PA recommendation documents: (i) minimum recommendations on frequency, duration, intensity and lengths of bouts of PA, (ii) recommendations on preventing inactivity or sedentary behavior (e.g. prolonged sitting), and (iii) any further PA recommendations for additional health benefits, obesity prevention, or specific types of PA. We extracted these data for all age brackets (children, adults, older adults) and special population groups (e.g. people with health-related conditions) listed in the respective document. Individual country results were then compared with the WHO Global Recommendations on PA for Health<sup>4</sup> and recommendations from the other EU Member States.

### **Results**

An official document outlining national PA recommendations could be located for 23 (82.1%) of the 28 EU Member States. For two countries, the official PA recommendations did not contain any specific information about minimum recommended PA levels. Four countries reported that they are in process of developing PA recommendations, and one country reported there are currently no plans to develop dedicated PA recommendations. Belgium has separate documents for the Flemish<sup>12</sup> and Walloon<sup>13</sup> regions, both of which were included into analysis. In total, 22 documents (21 national documents plus an additional one for Belgium), published between 2008 and 2018, were analyzed in greater detail (Table 1).

*[Table 1 about here]*

### *Children & Adolescents*

Table 2 presents a detailed overview of existing PA recommendations for children and adolescents in EU Member States. For this target group, WHO recommends at least 60 minutes of moderate- to vigorous-intensity PA every day, adding that greater amounts will provide further health benefits<sup>4</sup>.

Regarding duration and frequency of PA, all recommendations suggest the same minimum as WHO, i.e. 60 minutes per day. The two exceptions are Germany<sup>14</sup>, which calls for at least 90 minutes, and Finland<sup>15</sup>, which stipulates 90–120 minutes per day for children (7–12 years) and 60–90 minutes per day for adolescents (13–18 years). 11 countries mention that any amount exceeding minimum recommendations will provide additional health benefits. Lithuania suggests that, to achieve additional health benefits, “PA time must be longer than the minimum (60 minutes) and last for at least 1.5–2 hours (120 minutes) daily”<sup>16</sup>. Like WHO, 16 countries specify the intensity of recommended PA as moderate to vigorous.

As additional aspects, WHO emphasizes that most of the daily PA should be aerobic and that vigorous-intensity activities should be incorporated at least three times per week to strengthen muscle and bone<sup>4</sup>. Recommendations in 14 EU Member States mirror this, while Lithuania<sup>16</sup> advocates at least 2 times per week and Finland<sup>15</sup> proposes to do it every day. Germany mentions that, for children aged 6–11, “the large muscle groups should be subject to higher-intensity loading on two to three days a week in order to improve strength and endurance, taking into account respective developmental stages”<sup>14</sup>. Austria<sup>17</sup> and Denmark<sup>18</sup> additionally recommend to include activities to improve flexibility.

1  
2  
3  
4  
5 Belgium (Flanders)<sup>12</sup>, Denmark<sup>18</sup>, Finland<sup>15</sup> and Lithuania<sup>16</sup> specify that minimum bouts  
6  
7 of PA should be at least 10 minutes, while France<sup>19</sup> suggests at least 5 minutes for  
8  
9 children from 6–11 years. Minimum duration is part of WHO's recommendations for  
10  
11 adults (see below) but not for children. Also transcending WHO recommendations, 15  
12  
13 national documents include sections on avoiding extended periods of inactivity and  
14  
15 sitting among children and adolescents.  
16  
17  
18  
19  
20  
21

22 The results indicate notable differences in the handling of age subgroups among  
23  
24 children and adolescents (see Figure 1): In 2019, WHO published dedicated PA  
25  
26 recommendations for children under the age of 5<sup>20</sup>, but at the time of data collection,  
27  
28 WHO recommendations only addressed children aged 5 to 17. Six countries used exactly  
29  
30 the same age range. Others had already developed additional recommendations for  
31  
32 children younger than 5 (9 countries), or they had extended the age range of their  
33  
34 recommendations to this group (2 countries). Seven countries (Belgium (Flanders)<sup>12</sup>,  
35  
36 Finland<sup>21</sup>, France<sup>19</sup>, Germany<sup>14</sup>, Latvia<sup>22</sup>, Spain<sup>23</sup>, the United Kingdom<sup>24</sup>) recommend  
37  
38 for children under 5 to be active for at least 180 minutes per day. Denmark<sup>25</sup> calls for as  
39  
40 much PA "as possible", while Greece<sup>26</sup> and Ireland<sup>27</sup> recommend the same amount as for  
41  
42 older children, i.e. at least 60 minutes per day. In addition, 7 countries included 18 year-  
43  
44 olds in their recommendations for adolescents, and 6 introduced multiple age brackets  
45  
46 with specific recommendations.  
47  
48  
49  
50  
51  
52  
53

54 *[Table 2 about here]*

55  
56  
57 *[Figure 1 about here]*  
58  
59  
60

### Adults

A comparison of the 21 national PA recommendations for adults (18–64 years) with the respective WHO recommendation is presented in Table 3. In general, WHO advises adults to engage in at least 150 minutes of moderate-intensity aerobic PA throughout the week, or at least 75 minutes of vigorous-intensity aerobic PA, or an equivalent combination of moderate- and vigorous-intensity PA. PA should be performed in bouts of at least 10 minutes. Additional benefits can be gained from increasing moderate PA to 300 minutes per week, by engaging in 150 minutes of vigorous PA, or through an equivalent combination of both.

For 14 nations, recommendations on minimum duration, intensity and frequency of PA are fully in line with WHO. Croatia<sup>28</sup>, Denmark<sup>29</sup>, France<sup>19</sup>, Greece<sup>26</sup>, Lithuania<sup>16</sup>, Malta<sup>[38]</sup> and Belgium (Wallonia) [10] recommend 30 minutes of PA per day on 5 or more days per week, probably echoing older recommendations published jointly by the American College of Sports Medicine (ACSM) and the Centers for Disease Control and Prevention (CDC) in 1995<sup>30</sup> and updated in 2007<sup>31</sup>. Like WHO, 14 countries recommend to count only activities with a duration of at least 10 minutes, while France<sup>19</sup> and the Netherlands<sup>32</sup> suggest that bouts less than 10 minutes may also be counted. Seven countries mirror WHO's recommendations regarding additional health benefits, while 5 countries merely mention that health can be further improved by performing PA above the recommended minimum.

France<sup>19</sup>, Ireland<sup>27</sup> and Lithuania<sup>16</sup> recommend increasing the PA to 60 minutes of moderate PA per day on at least 5 days per week, or to equivalent amount of vigorous PA in order to achieve additional health benefits.

1  
2  
3  
4  
5 An additional aspect of the WHO recommendations are muscle-strengthening activities  
6 involving major muscle groups, which should be performed on 2 or more days of the  
7 week<sup>4</sup>. Sixteen of the EU Member States also urge their citizens to do this. France  
8 diverges slightly by stipulating that strength training should be performed 1–2 times per  
9 week, with 1–2 days' recovery time in between, and stretching at least 2–3 times per  
10 week<sup>19</sup>. Denmark<sup>29</sup> recommends to also add activities that increase flexibility. In  
11 addition, Ireland<sup>27</sup>, Malta<sup>33</sup> and the United Kingdom<sup>24</sup> have specific recommendations on  
12 reducing or maintaining body weight. Eleven countries also have additional  
13 recommendations on avoiding long periods of inactivity and sitting among adults.  
14  
15  
16  
17  
18  
19  
20  
21  
22  
23  
24  
25  
26  
27  
28

29 *[Table 3 about here]*  
30  
31  
32

### 33 *Older adults*

34  
35 Eighteen EU Member states have national PA recommendations for older people that  
36 were available for analysis. The contents of these are shown in Table 4. WHO's basic  
37 recommendations for older adults (65+), which are identical to those for adults aged  
38 18–64 (see above), have been directly adopted by twelve. In the 6 other cases, the  
39 original national recommendation for adults differs from that by WHO, but they also  
40 follow the practice of carrying over these recommendations to older people. All  
41 identified documents add that persons who cannot achieve minimum PA levels should  
42 be as physically active as their abilities and conditions allow.  
43  
44  
45  
46  
47  
48  
49  
50  
51  
52  
53  
54  
55  
56

57 WHO adds that older people should engage in muscle-strengthening involving major  
58 muscle groups on 2 or more days a week, and that those with poor mobility should  
59  
60

1  
2  
3 perform PA to enhance balance and prevent falls on 3 or more days per week. In general,  
4  
5 all national documents also include these additional aspects. No country has specific  
6  
7 recommendations for older adults on reducing or maintaining weight, but 11 add  
8  
9 recommendations on avoiding long periods of inactivity and sitting.  
10  
11  
12  
13  
14

15 *[Table 4 about here]*  
16  
17

### 18 *Special groups*

19  
20 As illustrated in Table 5, thirteen countries also have national PA recommendations for  
21  
22 at least one special population (e.g. frail people or those aged  $\geq 85$  years, pregnant or  
23  
24 breastfeeding women, people with disabilities or people with chronic diseases).  
25  
26 However, the level of detail of these recommendations varies significantly, as well as the  
27  
28 publication format: Finland published recommendations for all special groups as  
29  
30 separate documents, and Lithuania has a separate document for parents with small  
31  
32 children. All other countries mentioned special groups in the general document with  
33  
34 recommendations on PA. Twelve countries have recommendations for women during  
35  
36 pregnancy and breastfeeding. Most of these suggest that healthy women during  
37  
38 pregnancy and breastfeeding follow the same recommendations as for adults. Two  
39  
40 countries (France<sup>19</sup>, Lithuania<sup>34</sup>) have specific recommendations on duration, frequency  
41  
42 or intensity of PA during pregnancy. In addition, Lithuania<sup>34</sup> also addresses parents with  
43  
44 small children.  
45  
46  
47  
48  
49  
50  
51  
52  
53

54 Special recommendations for disabled people are provided by 9 countries. These are  
55  
56 mostly identical to the general recommendations but also include the reservation that  
57  
58 they should be adapted to the level and structure of the disability and to physical  
59  
60

1  
2  
3 conditions. Finland<sup>35</sup> has specific recommendations for three types of disability: adults  
4 with a disease or disability that causes some difficulty in movement; adults who use an  
5 assistive device for walking; and adults who use wheelchairs. Sweden<sup>36</sup> also specifically  
6 mention that children and adolescences with disabilities should try to reach PA levels  
7 recommended for their age under the supervision of a health professional.  
8  
9  
10  
11  
12  
13  
14  
15  
16

17 Nine countries (Austria<sup>17</sup>, Denmark<sup>37</sup>, Finland<sup>35</sup>, France<sup>19</sup>, Germany<sup>14</sup>, Ireland<sup>27</sup>,  
18 Latvia<sup>22</sup>, Lithuania<sup>16</sup> and Sweden<sup>38</sup>) have separate recommendations for people with  
19 chronic diseases, generally encouraging them to be as active as is recommended for the  
20 general population of their age. Latvia<sup>22</sup> and Lithuania<sup>16</sup> additionally recommend to seek  
21 medical advice before starting to exercise. France<sup>19</sup> developed a special  
22 recommendation on PA for people with cancer<sup>39</sup>.  
23  
24  
25  
26  
27  
28  
29  
30  
31  
32

33 Two countries (France<sup>19</sup> and Greece<sup>26</sup>) have recommendations for postmenopausal  
34 women, and 6 countries reported that they have special recommendations for very  
35 elderly adults (85+). However, no specific documents for this adult group could be  
36 identified in the context of this study.  
37  
38  
39  
40  
41  
42  
43  
44

45 *[Table 5 about here]*  
46  
47  
48  
49

## 50 **Discussion**

51  
52 This article has collected and analyzed data on national PA recommendations for EU  
53 Member States. Such an endeavor naturally comes with a number of limitations and  
54 potential caveats. First, the analysis is limited to documents published before April  
55 2018, and does not cover recommendations developed in several Member States since  
56  
57  
58  
59  
60



1  
2  
3 then. Examples include Hungary <sup>40</sup>, Italy <sup>41</sup>, Malta <sup>42</sup>, and the United Kingdom<sup>43</sup>.  
4  
5 Moreover, the visibility of national PA recommendations varies significantly, making  
6  
7 some documents more difficult to identify and retrieve than others. While some  
8  
9 recommendations are high-profile documents that are easily found on search engines,  
10  
11 advertised on dedicated websites, and sport an official-looking layout, some others are  
12  
13 hard to identify as government documents and exist only on national-language websites.  
14  
15 In this context, there is obviously a bias towards countries whose native language is  
16  
17 English and those that have chosen to publish supplementary English language versions  
18  
19 of their recommendations. We have attempted to overcome this problem by relying both  
20  
21 upon fellow PA researchers in the respective countries, the expertise of the WHO  
22  
23 Regional Office for Europe and, where necessary, direct inquiry with the national PA  
24  
25 Focal Points to ensure that all existing documents were reliably identified and obtained  
26  
27 for our analysis.  
28  
29  
30  
31  
32  
33  
34  
35

36 The language barrier is always one of the greatest potential issues in a cross-country  
37  
38 comparison, esp. when 21 different languages are involved as in this case. We worked to  
39  
40 solve this problem by using a combination of electronic translation and verification of  
41  
42 our initial translations by native speakers with a thorough background in PA promotion.  
43  
44 In our specific case, the issue was somewhat alleviated by the fact that most  
45  
46 recommendations were rather concise and did not use complicated language.  
47  
48  
49  
50  
51

52 All in all, we believe that our analysis, building on unique information obtained directly  
53  
54 from national governments obtained by the European Commission and WHO, provides  
55  
56 an excellent snapshot of existing PA recommendations in the EU, allowing us both to  
57  
58 assess the current situation in the Union and the progress made in the last years.  
59  
60

1  
2  
3  
4  
5 Our results show that the large majority of EU Member States currently either have  
6 national PA recommendations in place or are in the process of developing them. In  
7  
8 addition, there is a general tendency for Member States (13 out of 20) to build their  
9  
10 recommendations on the 2010 WHO Global Recommendations <sup>4</sup>. A minority of 7  
11  
12 countries based their recommendations on other documents such as the slightly older  
13  
14 ACSM/CDC recommendations <sup>31</sup>. Most of the countries (except for Austria, Finland and  
15  
16 Ireland) published their national PA recommendations in the years after WHO global  
17  
18 recommendations were released, but it may have taken a while for these new  
19  
20 recommendations to be universally known.  
21  
22  
23  
24  
25  
26  
27  
28

29 Children and adolescents are arguably the age group with the greatest variation  
30  
31 between countries, especially regarding the number and range of age brackets for which  
32  
33 separate recommendations exist. At the time of data collection, WHO recommendations  
34  
35 started at the age of 5, but 10 countries had already added information for younger age  
36  
37 groups. This may underline the relevance of this group for national policy-making, but  
38  
39 also the fact that PA needs diverge substantially along the continuum between very  
40  
41 young children and teenagers, and the evidence base for different age sub-groups is  
42  
43 constantly expanding.  
44  
45  
46  
47  
48  
49

50 Comparing our results to previous studies, we find that the number of countries in the  
51  
52 European Union with national PA recommendations has clearly increased over time,  
53  
54 from 16 in 2011 <sup>9</sup> via 19 in 2015 <sup>10</sup> to 23 in 2018. National PA recommendations for  
55  
56 children and adults were available for 21 countries, which is almost twice as many as in  
57  
58 2011 (11 for children and 12 for adults <sup>9</sup>). This development is most clearly visible for  
59  
60

1  
2  
3 older adults: In 2011, only 5 documents were available for analysis <sup>9</sup>; by 2018, this  
4  
5 number had increased to 18.  
6  
7  
8  
9

10 The analysis also showed that many countries have mentioned special population  
11  
12 groups in their recommendations in recent years. More than half (12) of reviewed  
13  
14 documents include recommendations for women during pregnancy and breastfeeding,  
15  
16 and several countries (9) specified PA recommendations for people with chronic  
17  
18 diseases. A few also (2) add recommendations for postmenopausal women. Special  
19  
20 target groups seem to be a relatively new topic, as they do not appear in previous  
21  
22 analyses of PA recommendations <sup>9 10</sup>.  
23  
24  
25  
26  
27  
28

29 Finally, the number of countries which incorporated recommendations on avoiding  
30  
31 prolonged periods of sitting or inactivity has also increased. In 2018, 13 countries had  
32  
33 such recommendations for children, 11 for adults, and 10 for older adults. These figures  
34  
35 had also been substantially lower in 2011, both for children and adolescents (4  
36  
37 countries) as well as for adults and older adults (UK only) <sup>9</sup>.  
38  
39  
40  
41  
42

43 By contrast, specific recommendations on reducing or maintaining body weight remain  
44  
45 relatively uncommon and are only mentioned the current PA recommendations of 3 EU  
46  
47 Member States.  
48  
49  
50  
51

## 52 **Conclusion**

53  
54 This article has presented an overview of the current status of PA recommendations in  
55  
56 EU Member States. It can be viewed in the context of efforts by the European  
57  
58 Commission to monitor the progress of implementation of the Council Recommendation  
59  
60

1  
2  
3 on HEPA across Sectors and by WHO to build capacity for PA promotion in the European  
4  
5 Region. It also helps highlight current developments in the field (e.g. further  
6  
7 differentiation of age groups, needs of special populations, relevance of sedentary  
8  
9 behavior and weight management) and the extent to which new research evidence is  
10  
11 translated into policy development. Some of these new additions may also be reflected  
12  
13 in the planned update to the 2010 WHO Global Recommendations, work on which is due  
14  
15 to begin in the second half of 2019 <sup>44</sup>.

16  
17  
18  
19  
20  
21 Our findings may also help inspire policy development in other countries of the WHO  
22  
23 European Region, who may, for example, look to EU countries with comparable  
24  
25 population size, geography or PA culture in order to decide how to best adopt and adapt  
26  
27 basic WHO recommendations to their own national situation. In this context, it may also  
28  
29 be interesting to analyze in greater detail which processes, tools and stakeholders  
30  
31 countries used to draw up their national recommendations. We are currently working  
32  
33 on such a comparison based on data from 17 EU Member States.

34  
35  
36  
37  
38  
39 From a scientific point of view, more research may be needed on the effectiveness of  
40  
41 national PA recommendations, i.e. their direct impact on population-level PA behavior  
42  
43 and the extent to which they guide (public) health professionals in their efforts to  
44  
45 promote PA. A related question is to what extent national adaptations of basic WHO  
46  
47 recommendations actually improve the effectiveness of PA promotion, and whether  
48  
49 these effects justify the effort of developing country-specific recommendations.  
50  
51  
52  
53  
54

55  
56  
57 The European Union Physical Activity Focal Points Network was instrumental both in  
58  
59 collecting the data which this study is based and in fostering exchange between EU  
60

1  
2  
3 Member States on how to improve and harmonize PA promotion for all citizens of the  
4  
5 Union. This analysis is therefore also testimony of the utility of international  
6  
7 collaboration in health promotion, both between EU Member States as well as between  
8  
9 the European Commission and WHO.  
10  
11  
12  
13  
14

15 **Acknowledgements:** We would like to thank the national representatives of the EU  
16  
17 Physical Activity Focal Points Network for their support in collecting the data for this  
18  
19 article. We would also like to thank Tuula Aira, Jacopo Cristini, Gregor Jurak, Susanna  
20  
21 Kugelberg, Nemanja Lakicevic, Lorena Miranda, Paschalis-Odyseas Moysidis, Jana  
22  
23 Pelclova, Julia Soquet, and Nina Vischer for verifying specific details in national PA  
24  
25 recommendation documents that were published in languages not spoken by the  
26  
27 authors.  
28  
29  
30  
31  
32

33 **Disclosure statement:** The writing group takes sole responsibility for the content of  
34  
35 this article and the content of this article reflects the views of the authors only. JB and  
36  
37 SW are staff members of the WHO. The authors alone are responsible for the views  
38  
39 expressed in this publication and they do not necessarily represent the decisions or the  
40  
41 stated policy of the World Health Organization.  
42  
43  
44  
45  
46

47 **Funding statement:** This research received no specific grant from any funding agency  
48  
49 in the public, commercial or not-for-profit sectors.  
50  
51  
52  
53

54 **Competing interests statement:** The authors declare that they have no competing  
55  
56 interests.  
57  
58  
59  
60

1  
2  
3 **Contributors:** PG, KAO and AT conceptualized the study. RM and STM developed the  
4 survey questionnaire and collected the survey data. JRB and SW supervised the survey.  
5  
6 PG, AT and KAO analyzed the survey data. AT obtained and analyzed national  
7  
8 recommendation documents. PG and KAO collected additional information from experts  
9  
10 and Physical Activity Focal Points. PG drafted the manuscript. All authors participated in  
11  
12 the revision of the article. All authors contributed to and have approved the final  
13  
14 manuscript.  
15  
16  
17  
18  
19  
20  
21  
22  
23  
24  
25  
26  
27  
28  
29  
30  
31  
32  
33  
34  
35  
36  
37  
38  
39  
40  
41  
42  
43  
44  
45  
46  
47  
48  
49  
50  
51  
52  
53  
54  
55  
56  
57  
58  
59  
60

## References

1. World Health Organisation. Global Strategy on Diet, Physical Activity and Health, 2004.
2. World Health Organisation. Physical activity strategy for the WHO European Region 2016-2025, 2015.
3. World Health Organisation. Global action plan on physical activity 2018–2030: more active people for a healthier world. Geneva, 2018.
4. World Health Organisation. Global Recommendations on Physical Activity for Health. Geneva, 2010.
5. European Commission. EU Physical Activity Guidelines. Recommended Policy Actions in Support of Health-Enhancing Physical Activity, 2008.
6. Council recommendation of 26 November 2013 on promoting health-enhancing physical activity across sectors. *Official Journal of the European Union* 2013;56:C 354/1 - /5.
7. Cameron C, Craig CL, Bull FC, et al. Canada's physical activity guides: has their release had an impact? *Canadian journal of public health = Revue canadienne de sante publique* 2007;98 Suppl 2:S161-9. [published Online First: 2008/01/25]
8. Rutten A, Abu-Omar K, Messing S, et al. How can the impact of national recommendations for physical activity be increased? Experiences from Germany. *Health research policy and systems* 2018;16(1):121. doi: 10.1186/s12961-018-0396-8 [published Online First: 2018/12/15]
9. Kahlmeier S, Wijnhoven TM, Alpiger P, et al. National physical activity recommendations: systematic overview and analysis of the situation in European countries. *BMC Public Health* 2015;15:133. doi: 10.1186/s12889-015-1412-3 [published Online First: 2015/04/17]

- 1  
2  
3 10. Breda J, Jakovljevic J, Rathmes G, et al. Promoting health-enhancing physical activity  
4  
5 in Europe: Current state of surveillance, policy development and implementation.  
6  
7 *Health Policy* 2018;122(5):519-27. doi: 10.1016/j.healthpol.2018.01.015  
8  
9 [published Online First: 2018/02/10]  
10  
11
- 12 11. World Health Organisation. Physical activity factsheets for the 28 European Union  
13  
14 Member States of the WHO European Region. Copenhagen: WHO Regional Office  
15  
16 for Europe 2018.  
17  
18
- 19 12. Vlaams Instituut Gezond Leven. Vlaamse gezondheidsaanbevelingen sedentair  
20  
21 gedrag (lang stilzitten) en lichaamsbeweging [Flemish health recommendations  
22  
23 on sedentary behaviour (long sitting) and physical activity]. Brussel: Vlaams  
24  
25 Instituut Gezond Leven vzw 2017.  
26  
27
- 28 13. UKK Institute. Physical exercise during and after pregnancy 2009 [Available from:  
29  
30 <http://www.ukkinstituutti.fi/filebank/276-englanti.pdf> accessed March 2019.  
31  
32
- 33 14. Rütten A, Pfeifer K, editors. *National recommendations for physical activity and*  
34  
35 *physical activity promotion*. Erlangen: FAU University Press, 2016.  
36  
37
- 38 15. Recommendations for the physical activity of school-aged children. Helsinki:  
39  
40 Ministry of education 2008.  
41  
42
- 43 16. Sveikatos mokymo ir ligų prevencijos centras. Fizinio aktyvumo rekomendacijos 3  
44  
45 amžiaus grupėms [Physical activity recommendations for 3 age groups] Vilnius:  
46  
47 Lietuvos Respublikos sveikatos apsaugos ministerija (Ministry of Health Republic  
48  
49 of Lithuania); [Available from: <https://sam.lrv.lt/lt/veiklos-sritys/visuomenes-sveikatos-prieziura/mityba-ir-fizinis-aktyvumas-2/fizinis-aktyvumas-mytyba-ir-fizinis-aktyvumas/rekomendacijos> accessed March 2019.  
50  
51  
52  
53  
54  
55  
56  
57  
58  
59  
60



- 1  
2  
3 17. Titze S, Ring-Dimitriou S, Schober PH, et al. Österreichische Empfehlungen für  
4  
5 gesundheitswirksame Bewegung [Austrian recommendations for health-  
6  
7 enhancing physical activity]. Wien: Fonds Gesundes Österreich 2010.  
8  
9
- 10  
11 18. Danish Health Authority. Recommendations for children and adolescents (5-17 years  
12  
13 old) Copenhagen2014 [Available from: [https://www.sst.dk/en/health-and-](https://www.sst.dk/en/health-and-lifestyle/physical-activity/recommendations/recommendations-for-children-and-adolescents)  
14  
15 [lifestyle/physical-activity/recommendations/recommendations-for-children-](https://www.sst.dk/en/health-and-lifestyle/physical-activity/recommendations/recommendations-for-children-and-adolescents)  
16  
17 [and-adolescents-](https://www.sst.dk/en/health-and-lifestyle/physical-activity/recommendations/recommendations-for-children-and-adolescents) accessed March 2019.  
18  
19
- 20  
21 19. Agence nationale de sécurité sanitaire de l'alimentation, de l'environnement et du  
22  
23 travail,. Actualisation des repères du PNNS - Révisions des repères relatifs à  
24  
25 l'activité physique et à la sédentarité [Revisions of benchmarks relating to  
26  
27 physical activity and sedentary lifestyle]. Maisons-Alfort, 2016.  
28
- 29  
30 20. World Health Organisation. Guidelines on physical activity, sedentary behaviour and  
31  
32 sleep for children under 5 years of age. Geneva: World Health Organisation 2019.  
33
- 34  
35 21. Finnish recommendations for physical activity in early childhood 2016. Joy, play and  
36  
37 doing together.: Ministry of the Education and Culture, 2016.  
38
- 39  
40 22. 2011. évi CXCV. törvény a nemzeti köznevelésről [Law on national public education]:  
41  
42 Nemzeti Jogszabálytár; 2011 [accessed April 2019].  
43
- 44  
45 23. Ministerio de Sanidad, Servicios Sociales e Igualdad,. Actividad Física para la Salud y  
46  
47 Reducción del Sedentarismo. Recomendaciones para la población [Physical  
48  
49 activity for health and reduction of sedentary lifestyle. Recommendations for the  
50  
51 population]. Madrid: Ministerio de sanidad, servicios sociales e igualdad centro  
52  
53 de publicaciones 2015.  
54
- 55  
56 24. Department of Health, Physical Activity, Health Improvement and Protection. Start  
57  
58 Active, Stay Active: A report on physical activity from the four home countries'  
59  
60 Chief Medical Officers. London, 2011.

- 1  
2  
3 25. Danish Health Authority. Recommendations for physical activity children 1–4 years  
4 old Copenhagen2016 [Available from: [https://www.sst.dk/en/health-and-](https://www.sst.dk/en/health-and-lifestyle/~/_media/038D1AD667D14453BB02E3AAD26F9033.ashx)  
5 [lifestyle/~/\\_media/038D1AD667D14453BB02E3AAD26F9033.ashx](https://www.sst.dk/en/health-and-lifestyle/~/_media/038D1AD667D14453BB02E3AAD26F9033.ashx) accessed  
6  
7 March 2019.  
8  
9  
10  
11  
12 26. The Institute of Preventive Medicine, Environmental and Occupational Health.  
13 Σωματική Δραστηριότητα, Συστάσεις [Physical activity recommendations]  
14 [Available from: <http://www.diatrofikoiodigoi.gr/?Page=systaseis> accessed  
15  
16 March 2019.  
17  
18  
19  
20  
21 27. Department of Health and Children, Health Service Executive. The National  
22 Guidelines on Physical Activity for Ireland, 2009.  
23  
24  
25  
26 28. Hrvatski zavod za javno zdravstvo. Živjeti zdravo: tjelesno zdravlje [Healthy Living:  
27 Physical Health]. Zagreb.  
28  
29  
30  
31 29. Danish Health Authority. Recommendations for adults (18-64 years old)  
32 Copenhagen2014 [Available from: [https://www.sst.dk/en/health-and-](https://www.sst.dk/en/health-and-lifestyle/physical-activity/recommendations/recommendations-for-adults)  
33 [lifestyle/physical-activity/recommendations/recommendations-for-adults](https://www.sst.dk/en/health-and-lifestyle/physical-activity/recommendations/recommendations-for-adults)  
34  
35 accessed March 2019.  
36  
37  
38  
39  
40 30. Pate RR, Pratt M, Blair S, et al. Physical activity and public health. A recommendation  
41 from the Centers for Disease Control and Prevention and the American College of  
42 Sports Medicine. *JAMA* 1995;273(5):402-07.  
43  
44  
45  
46 31. Haskell WL, Lee IM, Pate RR, et al. Physical activity and public health: updated  
47 recommendation for adults from the American College of Sports Medicine and  
48 the American Heart Association. *Med Sci Sports Exerc* 2007;39(8):1423-34.  
49  
50  
51  
52 32. Health Council of the Netherlands. Physical activity guidelines 2017. The Hague:  
53 Health Council of the Netherlands 2017.  
54  
55  
56  
57  
58  
59  
60

- 1  
2  
3 33. Superintendence of Public Health Ministry for Health, the Elderly and Community  
4 Care. A Healthy Weight for Life: A National Strategy for Malta 2012 - 2020. Msida:  
5 Superintendence of Public Health 2012.  
6  
7  
8  
9
- 10 34. Zabolotnaja T, Zumeras R, Rimdeikienė I, et al. Tėvų su kūdikiais mankštos  
11 rekomendacijos [Physical activity recommendations for parents with babies],  
12 2017.  
13  
14  
15  
16
- 17 35. UKK Institute. Kolme soveltavaa liikuntapiirakkaa toimintakyvyn mukaan [Three  
18 suitable exercise pies according to persons movement ability] [Available from:  
19 [http://www.ukkinstituutti.fi/liikuntapiirakka/soveltavat\\_liikuntapiirakat](http://www.ukkinstituutti.fi/liikuntapiirakka/soveltavat_liikuntapiirakat)  
20 accessed March 2019.  
21  
22  
23  
24  
25
- 26 36. Yrkesföreningar Fysisk Aktivitet. Hur mycket fysisk aktivitet behöver barn och  
27 ungdomar? [How much physical activity do children and young people need?:  
28 Yrkesföreningar Fysisk Aktivitet; [Available from:  
29 [http://www.fyss.se/rekommendationer-for-fysisk-aktivitet/for-barn-och-  
30 ungdomar/](http://www.fyss.se/rekommendationer-for-fysisk-aktivitet/for-barn-och-ungdomar/) accessed March 2019.  
31  
32  
33  
34  
35  
36  
37
- 38 37. Danish Health Authority. Recommendations for older people (65 years old and  
39 older) Copenhagen2014 [Available from: [https://www.sst.dk/en/health-and-  
40 lifestyle/physical-activity/recommendations/recommendations-for-older-  
41 people-](https://www.sst.dk/en/health-and-lifestyle/physical-activity/recommendations/recommendations-for-older-people-) accessed March 2019.  
42  
43  
44  
45  
46  
47
- 48 38. Yrkesföreningar för Fysisk Aktivitet. Rekommendationer om fysisk aktivitet för  
49 vuxna: Yrkesföreningar för Fysisk Aktivitet; 2011 [Available from:  
50 <http://www.yfa.se/rekommendationer-for-fysisk-aktivitet/> accessed March  
51 2019.  
52  
53  
54  
55  
56
- 57 39. Istitut National du Cancer. Bénéfices de l'activité physique pendant et après cancer.  
58 Des connaissances scientifiques aux repères pratique [Benefits of physical  
59  
60

activity during and after cancer. From scientific knowledge to practical benchmarks]: Istitut National du Cancer 2017.

40. Magyar Diáksport Szövetség [The Hungarian Student Sport Association]. Hivatalosan is elstartolt a DO60 mozgalom a HIPE 2018 – nemzetközi testnevelési konferencián #társak #játék [The DO60 movement at HIPE 2018 - international bodybuilding conference is officially started #people #game] 2018 [Available from: <http://www.mdsz.hu/hirek-hu/mdsz-hu-hu/2018/11/15/hivatalosan-is-elstartolt-a-do60-mozgalom-a-hipe-2018-nemzetkozi-testnevelesi-konferencian-tarsak-jatek/> accessed August 8 2019.
41. De Mei B, Cadeddu C, Luzi P, et al., editors. *Movimento, sport e salute: l'importanza delle politiche di promozione dell'attività fisica e le ricadute sulla collettività* [Movement, sport and health: the importance of policies to promote physical activity and the effects on the community]. Roma: Istituto Superiore di Sanità, 2018.
42. Palamentary secretariat for youth, sport and voluntary organisations,. Aiming higher. An Overview of the National Strategy for Sport and Physical Activity in Malta 2019 [
43. Foster C. Overview of the 2019 Physical Activity. Guidelines and implementation plans 2018 [Available from: <http://www.fuse.ac.uk/media/sites/researchwebsites/fuse/Overview%20of%20the%202019%20Physical%20Guidelines%20and%20implementation%20plans%20-%20Charlie%20Foster.pdf> accessed August 2019.
44. World Health Organisation. Call for Expression of Interest to participate in the WHO Guideline Development Group for the updating of the 2010 Global Recommendations on Physical Activity in Youth, Adults and Older Adults

Genewa: World Health Organisation; 2019 [Available from: <https://www.who.int/ncds/prevention/physical-activity/update-global-recommendations-physical-activity/en/> accessed April 2019.

45. Ministerstvo zdravotnictví. Zdraví 2020 Národní strategie ochrany a podpory zdraví a prevence nemocí. Akční plán č. 1: Podpora pohybové aktivity na období 2015-2020 [Health 2020 National strategy for the protection and promotion of Health and disease prevention. Action Plan 1: support for physical activity 2015-2020]: Ministerstvo zdravotnictví; 2015 [Available from: [http://www.mzcr.cz/Admin/\\_upload/files/5/ak%C4%8Dn%C3%AD%20pl%C3%A1ny%20-%20p%C5%99%C3%ADlohy/AP%2001%20podpora%20pohybov%C3%A9%20aktivit.pdf](http://www.mzcr.cz/Admin/_upload/files/5/ak%C4%8Dn%C3%AD%20pl%C3%A1ny%20-%20p%C5%99%C3%ADlohy/AP%2001%20podpora%20pohybov%C3%A9%20aktivit.pdf) accessed April 2019.
46. Danish Health Authority. Recommendations for pregnant women Copenhagen2014 [Available from: <https://www.sst.dk/en/health-and-lifestyle/physical-activity/recommendations/pregnant-women> accessed March 2019.
47. Danish Health Authority. Recommendations for physical activity infants younger than 1 year old Copenhagen2016 [Available from: [https://www.sst.dk/en/health-and-lifestyle/~/\\_media/4D712D1E17794FCCA10B18B3BE8CD0DD.ashx](https://www.sst.dk/en/health-and-lifestyle/~/_media/4D712D1E17794FCCA10B18B3BE8CD0DD.ashx) accessed March 2019.
48. Tervise Arengu Instituut. Kehalise aktiivsuse soovitud lastele ja noortele [Recommendations for physical activity for children and young people] 2015 [Available from: <http://www.terviseinfo.ee/et/valdkonnad/liikumine/soovitud-liikumiseks/lastele-ja-noortele> accessed March 2019.

- 1  
2  
3 49. Tervise Arengu Instituut. Kehalise aktiivsuse soovitused täiskasvanutele  
4  
5 [Recommendations for physical activity for adults] 2015 [Available from:  
6  
7 10  
11 14  
15 18  
19 22  
23 26  
27 30  
31 34  
35 38  
39 42  
43 46  
47 50  
51 54  
55 58  
59 liikumiseks/taiskasvanutele">http://www.terviseinfo.ee/et/valdkonnad/liikumine/soovitused-  
liikumiseks/taiskasvanutele accessed March 2019.
51. Reduce sedentary time – get healthier! National recommendations to reduce  
sedentary time. Helsinki: Ministry of social affairs and Health,, Finland, 2015.
52. UKK Institute. Terveysliikunnan suositus yli 65-vuotiaille [Physical activity  
recommendations for people over 65 years] 2008 [Available from:  
[http://www.ukkinstituutti.fi/filebank/2890-UKK-liikuntapiirakka-yli-65-v-  
tulostettava.pdf](http://www.ukkinstituutti.fi/filebank/2890-UKK-liikuntapiirakka-yli-65-v-<br/>tulostettava.pdf) accessed March 2019.
53. UKK Institute. Physical Activity Pie 2009 [Available from:  
[http://www.ukkinstituutti.fi/en/products-services/physical\\_activity\\_pie](http://www.ukkinstituutti.fi/en/products-services/physical_activity_pie)  
accessed March 2019.
54. Ministero della Salute. Informativa OMS: attività fisica [WHO information: physical  
activity], 2014.
55. Ernährung und Bewegung [Nutrition and physical activity]: Ministère de la Santé  
(Ministerium für Gesundheit) 2016.
56. Národný akčný plán pre podporu pohybovej aktivity na roky 2017 - 2020 [National  
Action Plan to Support Physical Activity for 2017-2020]. Bratislava, 2017.

1  
2  
3 57. Resolucija o nacionalnem programu o prehrani in telesni dejavnosti za zdravje  
4  
5 2015–2025 [Resolution on the national programme on nutrition and physical  
6  
7 activity for health 2015-2025], 2015.  
8  
9

10 58. Department of Health and Social Care. Physical activity in pregnancy infographic  
11  
12 London2017 [Available from:  
13  
14 [https://assets.publishing.service.gov.uk/government/uploads/system/uploads/  
15  
16 attachment\\_data/file/622336/CMO\\_physical\\_activity\\_pregnant\\_women\\_infogra  
17  
18 phic.jpg](https://assets.publishing.service.gov.uk/government/uploads/system/uploads/attachment_data/file/622336/CMO_physical_activity_pregnant_women_infographic.jpg) accessed August 2019.  
19  
20  
21  
22  
23  
24  
25  
26  
27  
28  
29  
30  
31  
32  
33  
34  
35  
36  
37  
38  
39  
40  
41  
42  
43  
44  
45  
46  
47  
48  
49  
50  
51  
52  
53  
54  
55  
56  
57  
58  
59  
60

**Table 1.** National physical activity recommendations in EU Member States, by year and population group(s) covered

| Countries                                   | Publication year      |        |              |                                                  |
|---------------------------------------------|-----------------------|--------|--------------|--------------------------------------------------|
|                                             | Children/ adolescents | Adults | Older adults | Special populations<br>(see Table 5 for details) |
| <b>Austria</b> <sup>17</sup>                | 2010                  | 2010   | 2010         | 2010                                             |
| <b>Belgium (Flanders)</b> <sup>12</sup>     | 2017                  | 2017   | 2017         | 2017                                             |
| <b>Belgium (Wallonia)</b> <sup>13</sup>     | n/a                   | n/a    |              |                                                  |
| <b>Bulgaria</b>                             |                       |        |              |                                                  |
| <b>Croatia</b> <sup>28</sup>                | n/a                   | n/a    |              |                                                  |
| <b>Cyprus</b>                               |                       |        |              |                                                  |
| <b>Czech Republic</b> <sup>45</sup>         | 2015*                 | 2015*  | 2015*        |                                                  |
| <b>Denmark</b> <sup>18 25 29 37 46 47</sup> | 2011, 2016            | 2011   | 2011         | 2011                                             |
| <b>Estonia</b> <sup>48-50</sup>             | 2015                  | 2015   | 2015         |                                                  |
| <b>Finland</b> <sup>13 15 21 35 51-53</sup> | 2008, 2016            | 2009   | 2008         | 2009, n/a                                        |
| <b>France</b> <sup>19 39</sup>              | 2016                  | 2016   | 2016         | 2016, 2017                                       |
| <b>Germany</b> <sup>14</sup>                | 2016                  | 2016   | 2016         | 2016                                             |
| <b>Greece</b> <sup>26</sup>                 | n/a                   | n/a    | n/a          | n/a                                              |
| <b>Hungary</b> <sup>22</sup>                | 2011**                |        |              |                                                  |
| <b>Ireland</b> <sup>27</sup>                | 2009                  | 2009   | 2009         | 2009                                             |
| <b>Italy</b> <sup>54</sup>                  | 2014                  | 2014   |              |                                                  |
| <b>Latvia</b> <sup>22</sup>                 | n/a                   | n/a    | n/a          | n/a                                              |
| <b>Lithuania</b> <sup>16 34</sup>           | n/a                   | n/a    | n/a          | 2017, n/a                                        |
| <b>Luxembourg</b> <sup>55</sup>             | 2016                  | 2016   | 2016         |                                                  |
| <b>Malta</b> <sup>33</sup>                  | 2012                  | 2012   | 2012         |                                                  |
| <b>Netherlands</b> <sup>32</sup>            | 2017                  | 2017   | 2017         |                                                  |
| <b>Poland</b>                               |                       |        |              |                                                  |
| <b>Portugal</b>                             |                       |        |              |                                                  |
| <b>Romania</b>                              |                       |        |              |                                                  |
| <b>Slovakia</b> <sup>56</sup>               | 2017                  | 2017   |              |                                                  |
| <b>Slovenia</b> <sup>57</sup>               | 2015                  | 2015   | 2015         |                                                  |
| <b>Spain</b> <sup>23</sup>                  | 2015                  | 2015   | 2015         | 2015                                             |
| <b>Sweden</b> <sup>36 38</sup>              | n/a                   | 2011   | 2011         | 2011                                             |
| <b>United Kingdom</b> <sup>24 58</sup>      | 2011                  | 2011   | 2011         | 2011, 2017                                       |

*n/a = year of publication is not available*

*\* document does not include information about the duration, intensity and frequency of PA*

*\*\* document does not include information about the duration, intensity and frequency of PA but about daily mandatory PE in elementary and secondary schools*



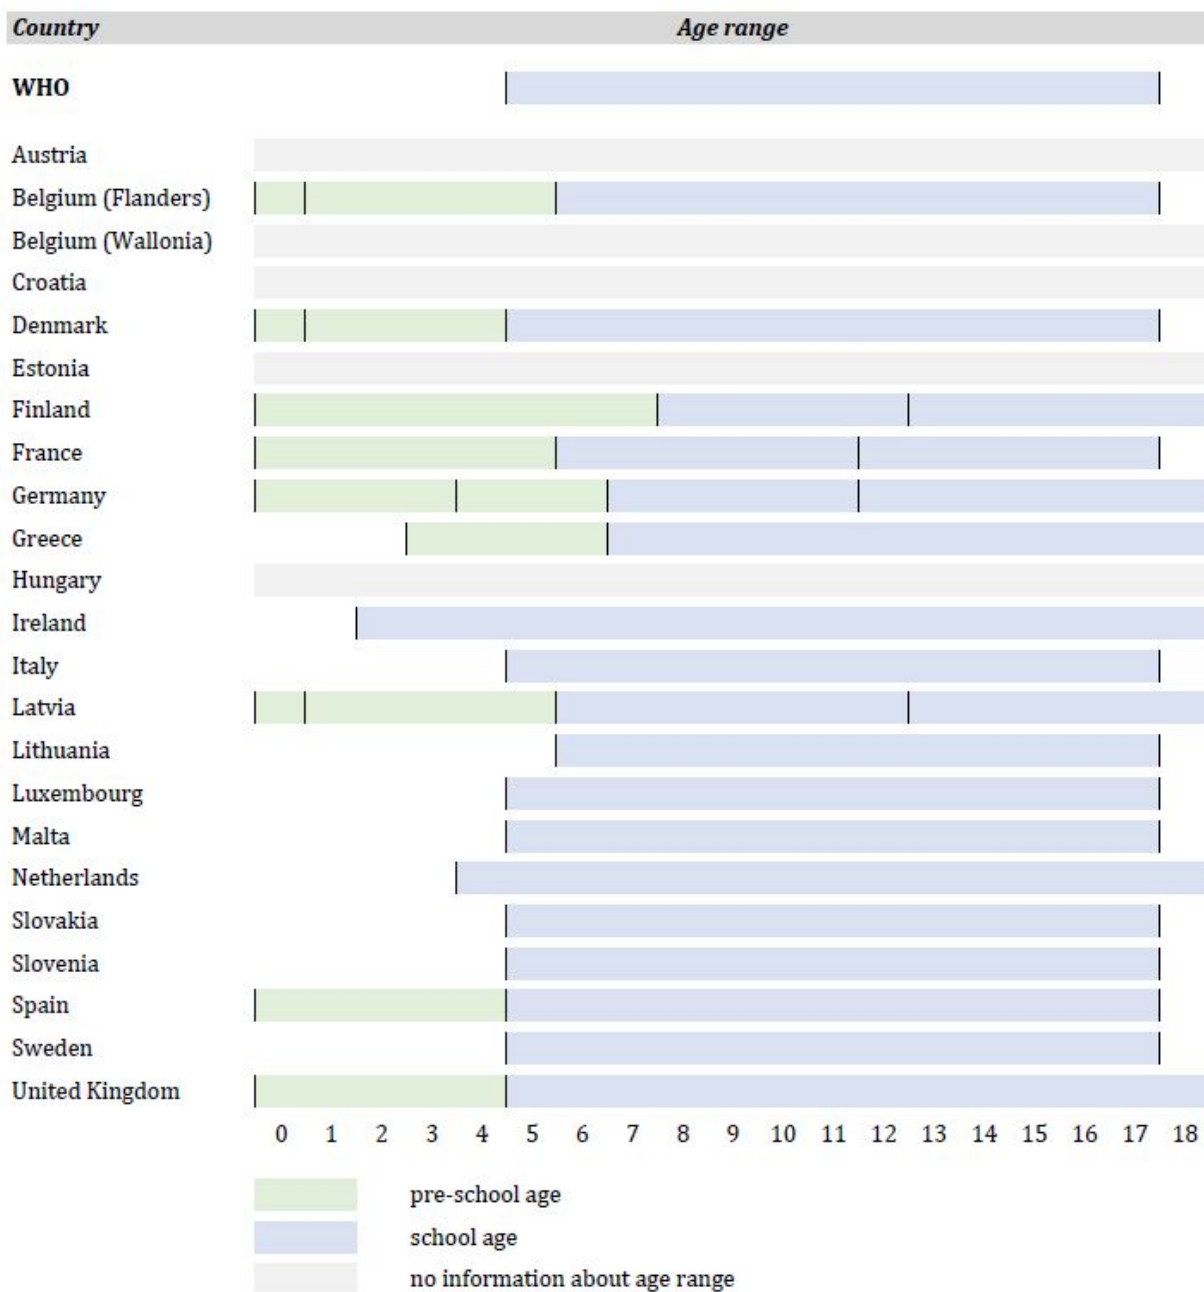

**Figure 1.** Comparison of age ranges in national PA recommendations for children and adolescents. WHO: World Health Organization.

**Table 2.** National PA recommendations for children and adolescents in comparison to WHO recommendations

| Country                   | Age group | Minimum duration, intensity and frequency of PA |                                                                                                                                            | Additional aspects |                                                                                                                                                                                                     | Reducing sitting/inactivity |
|---------------------------|-----------|-------------------------------------------------|--------------------------------------------------------------------------------------------------------------------------------------------|--------------------|-----------------------------------------------------------------------------------------------------------------------------------------------------------------------------------------------------|-----------------------------|
|                           |           | Same as WHO                                     | Differences to WHO                                                                                                                         | Same as WHO        | Differences to WHO                                                                                                                                                                                  |                             |
| <b>WHO</b>                | 5–17      |                                                 | At least 60 minutes of moderate- to vigorous-intensity physical activity daily. PA beyond minimum duration has additional health benefits. |                    | Most of the daily physical activity should be aerobic. Vigorous-intensity activities should be incorporated, including those that strengthen muscle and bone, at least 3 times per week             |                             |
| <b>Austria</b>            | n/s       | √                                               |                                                                                                                                            | √                  | Additional activities to improve coordination and flexibility are recommended                                                                                                                       | √                           |
| <b>Belgium (Flanders)</b> | <1        |                                                 | As much as possible, daily                                                                                                                 |                    | Give freedom of movement in accordance with their physical possibilities in safe environment                                                                                                        | √                           |
|                           | 1–5       |                                                 | At least 180 minutes/day, any type of intensity                                                                                            |                    | It is important for toddlers and preschoolers to encourage a variety of exercise activities, which also are tailored to their age and enjoyable.                                                    | √                           |
|                           | 6–17      | √                                               | Minimum bouts – at least 10 minutes                                                                                                        | √                  |                                                                                                                                                                                                     | √                           |
| <b>Belgium (Wallonia)</b> | n/s       | √                                               |                                                                                                                                            |                    | n/s                                                                                                                                                                                                 |                             |
| <b>Croatia</b>            | n/s       | √                                               |                                                                                                                                            |                    | n/s                                                                                                                                                                                                 |                             |
| <b>Denmark</b>            | <1        |                                                 | As much as possible, daily                                                                                                                 |                    | Maximize floor-based tummy time for infants when they are awake. Ensure that infants are physically active in various ways during the day. Ensure that infants can move freely as much as possible. |                             |
|                           | 1–4       |                                                 | As much as possible, daily                                                                                                                 |                    | Ensure that children are physically active in various ways during the day. Ensure that children can move freely as much as possible.                                                                | √                           |
|                           | 5–17      | √                                               | Minimum bouts – at least 10 minutes                                                                                                        | √                  | Vigorous-intensity activities that strengthen muscle and bone should last at least 30 minutes. Additional activities to improve flexibility are recommended.                                        |                             |
| <b>Estonia</b>            | n/s       | √                                               |                                                                                                                                            | √                  |                                                                                                                                                                                                     | √                           |
| <b>Finland</b>            | <8        |                                                 | At least 180 minutes/day<br>2 hours moderate PA and 1 hour vigorous PA                                                                     |                    | n/s                                                                                                                                                                                                 | √                           |
|                           | 7–12      |                                                 | At least 1.5–2 hours/day<br>Minimum bouts – at least 10 minutes                                                                            | √                  | Vigorous-intensity PA should be performed daily                                                                                                                                                     | √                           |
|                           | 13–18     |                                                 | At least 1–1.5 hours/day<br>Minimum bouts – at least 10 minutes                                                                            | √                  | Vigorous-intensity PA should be performed daily                                                                                                                                                     | √                           |
| <b>France</b>             | <5        |                                                 | At least 180 minutes/day<br>Or 15 minutes/hour                                                                                             |                    | PA should include various motor activities based on the development of basic motor skills. The playfulness of the proposed activities should be in priority.                                        | √                           |
|                           | 6–11      | √                                               | Minimum bouts – at least 5 minutes                                                                                                         | √                  | Activities that strengthen muscle and bone should last at least 20 minutes (non-consecutive days)                                                                                                   | √                           |
|                           | 12–17     | √                                               |                                                                                                                                            |                    | Activities that strengthen muscle and bone should last at least 20 minutes (non-consecutive days)                                                                                                   | √                           |

Table 2 continued.

| Country        | Age group        | Minimum duration, intensity and frequency of PA |                                                            | Additional aspects |                                                                                                                                                                                                    | Reducing sitting/inactivity |
|----------------|------------------|-------------------------------------------------|------------------------------------------------------------|--------------------|----------------------------------------------------------------------------------------------------------------------------------------------------------------------------------------------------|-----------------------------|
|                |                  | Same as WHO                                     | Differences to WHO                                         | Same as WHO        | Differences to WHO                                                                                                                                                                                 |                             |
| Germany        | <3               |                                                 | As much as possible, daily                                 |                    | A safe environment must be ensured                                                                                                                                                                 | √                           |
|                | 4-6              |                                                 | At least 180 minutes/day                                   |                    | n/s                                                                                                                                                                                                | √                           |
|                | 6-11             |                                                 | At least 90 minutes/day, moderate to vigorous intensity PA |                    | The large muscle groups should be subject to higher-intensity loading on two to three days a week in order to improve strength and endurance, taking into account respective developmental stages. | √                           |
|                | 12-18            |                                                 | At least 90 minutes/day, moderate to vigorous intensity PA |                    | n/s                                                                                                                                                                                                | √                           |
| Greece         | 3-6              | √                                               |                                                            |                    | Encourage a variety of activities within the week. These activities should be both enjoyable and safe.                                                                                             | √                           |
|                | 7-18             | √                                               |                                                            |                    | n/s                                                                                                                                                                                                | √                           |
| Ireland        | 2-18             | √                                               |                                                            | √                  |                                                                                                                                                                                                    |                             |
| Italy          | 5-17             | √                                               |                                                            |                    | n/s                                                                                                                                                                                                | √                           |
| Latvia         | <1               |                                                 | As much as possible, daily                                 |                    | Important to encourage to be active, developing child's muscles and motor skills                                                                                                                   |                             |
|                | 1-5              |                                                 | At least 180 minutes/day                                   |                    | n/s                                                                                                                                                                                                | √                           |
|                | 5-12             | √                                               |                                                            | √                  |                                                                                                                                                                                                    | √                           |
|                | 12-18            | √                                               |                                                            | √                  | Activities that strengthen muscle and bone should last at least 20 minutes                                                                                                                         |                             |
| Lithuania      | 6-17             | √                                               |                                                            |                    | Vigorous intensity PA should be performed at least 2times/week                                                                                                                                     | √                           |
| Luxembourg     | 5-17             | √                                               |                                                            | √                  |                                                                                                                                                                                                    |                             |
| Malta          | 5-17             | √                                               |                                                            |                    | n/s                                                                                                                                                                                                |                             |
| Netherlands    | 4-18             | √                                               |                                                            | √                  |                                                                                                                                                                                                    | √                           |
| Slovakia       | 5-17             | √                                               |                                                            |                    | n/s                                                                                                                                                                                                |                             |
| Slovenia       | 5-17             | √                                               |                                                            | √                  |                                                                                                                                                                                                    |                             |
| Spain          | Not able to walk |                                                 | Promote physical activity several times a day              |                    | PA in safe environments, particularly through ground games or super-vised activities in the water (swimming pools or at home bath time)                                                            | √                           |
|                | <5, able to walk |                                                 | At least 180 minutes/day, all levels of intensity          |                    | Carry out activities and games that develop basic motor skills in different environments (at home, in the park, in the swimming pool, etc.)                                                        | √                           |
|                | 5-17             | √                                               |                                                            | √                  |                                                                                                                                                                                                    | √                           |
| Sweden         | 5-17             | √                                               |                                                            | √                  |                                                                                                                                                                                                    |                             |
| United Kingdom | <5               |                                                 | At least 180 minutes/day                                   |                    | PA should be encouraged from birth, particularly through floor-based play and water-based activities in safe environments.                                                                         | √                           |
|                | 5-18             | √                                               |                                                            | √                  |                                                                                                                                                                                                    | √                           |

n/s: not specified; WHO: World Health Organization; PA: physical activity

**Table 3.** National PA recommendations for adults (18–64 years) in comparison to WHO recommendations

| Country                   | Minimum duration, intensity and frequency of PA |                                                                                                                                                                                                                                                                                                                                                 | Additional aspects |                                                                                                                                         | Reducing sitting/inactivity |
|---------------------------|-------------------------------------------------|-------------------------------------------------------------------------------------------------------------------------------------------------------------------------------------------------------------------------------------------------------------------------------------------------------------------------------------------------|--------------------|-----------------------------------------------------------------------------------------------------------------------------------------|-----------------------------|
|                           | Same as WHO                                     | Differences to WHO                                                                                                                                                                                                                                                                                                                              | Same as WHO        | Differences to WHO                                                                                                                      |                             |
| <b>WHO</b>                |                                                 | At least 150 minutes of moderate aerobic PA throughout the week, or 75 minutes of vigorous aerobic PA, or an equivalent combination of both. Bouts should be at least 10 minutes each. For additional health benefits, increase moderate PA to 300 minutes per week, or engage in 150 minutes of vigorous PA/an equivalent combination of both. |                    | Muscle-strengthening activities should be done involving major muscle groups on 2 or more days a week.                                  |                             |
| <b>Austria</b>            | √                                               |                                                                                                                                                                                                                                                                                                                                                 | √                  |                                                                                                                                         |                             |
| <b>Belgium (Flanders)</b> |                                                 | At least 150 minutes of moderate intensity PA per week should be performed 5 days and preferably all days of the week, at least 30 minutes per day. Or 75 minutes vigorous PA as best spread over e.g. 3 days of 25 minutes. Inactive adults over the age of 45 should consult a general practitioner before starting vigorous intensity PA.    | √                  |                                                                                                                                         | √                           |
| <b>Belgium (Wallonia)</b> |                                                 | At least 30 minutes/day                                                                                                                                                                                                                                                                                                                         |                    |                                                                                                                                         |                             |
| <b>Croatia</b>            |                                                 | At least 30 minutes/day of moderate intensity PA                                                                                                                                                                                                                                                                                                |                    | n/s                                                                                                                                     |                             |
| <b>Denmark</b>            |                                                 | PA for at least 30 minutes per day. The activity should be of moderate to high intensity and extend beyond the usual short-term daily activities. If the 30 minutes are divided, each activity should last at least 10 minutes.                                                                                                                 | √                  | High intensity training should last at least 20 minutes. Incorporate activities that increase bone strength and flexibility.            |                             |
| <b>Estonia</b>            | √                                               |                                                                                                                                                                                                                                                                                                                                                 | √                  |                                                                                                                                         | √                           |
| <b>Finland</b>            | √                                               |                                                                                                                                                                                                                                                                                                                                                 | √                  |                                                                                                                                         | √                           |
| <b>France</b>             |                                                 | At least 30 minutes/day at least 5 days per week moderate to vigorous intensity. Vigorous intensity PA is recommended in short-term (5–10 min) and repeated in the day (3–4 times).                                                                                                                                                             |                    | Strength training is recommended 1–2 times a week, with 1–2 days recover in between each session. Stretching at least 2–3 times a week. | √                           |
| <b>Germany</b>            | √                                               |                                                                                                                                                                                                                                                                                                                                                 | √                  |                                                                                                                                         | √                           |
| <b>Greece</b>             |                                                 | At least 30 minutes/day                                                                                                                                                                                                                                                                                                                         |                    | n/s                                                                                                                                     | √                           |
| <b>Ireland</b>            | √                                               |                                                                                                                                                                                                                                                                                                                                                 | √                  |                                                                                                                                         |                             |
| <b>Italy</b>              | √                                               |                                                                                                                                                                                                                                                                                                                                                 |                    | n/s                                                                                                                                     |                             |
| <b>Latvia</b>             | √                                               |                                                                                                                                                                                                                                                                                                                                                 | √                  |                                                                                                                                         |                             |
| <b>Lithuania</b>          |                                                 | At least 30 minutes of moderate-intensity PA every day in bouts of at least 10 minutes. As an alternative, no less than 15 minutes of high-intensity PA daily, or an appropriate combination of moderate- and high-intensity PA.                                                                                                                | √                  |                                                                                                                                         |                             |
| <b>Luxembourg</b>         | √                                               |                                                                                                                                                                                                                                                                                                                                                 | √                  |                                                                                                                                         |                             |
| <b>Malta</b>              |                                                 | At least 30 minutes of moderate-intensity physical activity 5 days per week; or 20 minutes of vigorous-intensity physical activity 3 days per week; or an equivalent combination of moderate and vigorous-intensity PA.                                                                                                                         | √                  |                                                                                                                                         |                             |
| <b>Netherlands</b>        | √                                               | Minimum bouts of PA can be less than 10 minutes                                                                                                                                                                                                                                                                                                 | √                  |                                                                                                                                         | √                           |
| <b>Slovakia</b>           | √                                               |                                                                                                                                                                                                                                                                                                                                                 |                    | n/s                                                                                                                                     |                             |
| <b>Slovenia</b>           | √                                               |                                                                                                                                                                                                                                                                                                                                                 | √                  |                                                                                                                                         | √                           |
| <b>Spain</b>              | √                                               |                                                                                                                                                                                                                                                                                                                                                 | √                  |                                                                                                                                         | √                           |
| <b>Sweden</b>             | √                                               |                                                                                                                                                                                                                                                                                                                                                 | √                  |                                                                                                                                         | √                           |
| <b>United Kingdom</b>     | √                                               |                                                                                                                                                                                                                                                                                                                                                 | √                  |                                                                                                                                         | √                           |

n/s: not specified; WHO: World Health Organization; PA: physical activity

**Table 4.** National PA recommendations for older adults (65+ years) in comparison to WHO recommendations

| Country                   | Minimum duration, intensity and frequency of PA |                                                                                                                                                                                                                                                                                                                                                                                                                  | Additional aspects |                                                                                                                                                                                                                                                                       | Reducing sitting/inactivity |
|---------------------------|-------------------------------------------------|------------------------------------------------------------------------------------------------------------------------------------------------------------------------------------------------------------------------------------------------------------------------------------------------------------------------------------------------------------------------------------------------------------------|--------------------|-----------------------------------------------------------------------------------------------------------------------------------------------------------------------------------------------------------------------------------------------------------------------|-----------------------------|
|                           | Same as WHO                                     | Differences to WHO                                                                                                                                                                                                                                                                                                                                                                                               | Same as WHO        | Differences to WHO                                                                                                                                                                                                                                                    |                             |
| <b>WHO</b>                |                                                 | 150 minutes of moderate-intensity aerobic PA throughout the week, or at least 75 minutes of vigorous-intensity aerobic PA, or an equivalent combination of moderate- and vigorous-intensity PA. PA should be performed in bouts of at least 10 minutes. For additional health benefits, increase moderate PA to 300 minutes per week, or engage in 150 minutes of vigorous PA/an equivalent combination of both. |                    | Muscle-strengthening involving major muscle groups on 2 or more days a week. Older adults with poor mobility should perform PA to enhance balance and prevent falls on 3 or more days per week.                                                                       |                             |
| <b>Austria</b>            | √                                               |                                                                                                                                                                                                                                                                                                                                                                                                                  | √                  |                                                                                                                                                                                                                                                                       |                             |
| <b>Belgium (Flanders)</b> | √                                               |                                                                                                                                                                                                                                                                                                                                                                                                                  | √                  |                                                                                                                                                                                                                                                                       | √                           |
| <b>Denmark</b>            |                                                 | PA for at least 30 minutes per day. PA should be moderate to high intensity and should extend beyond the usual short-term daily activities. If the 30 minutes is divided, each activity should last at least 10 minutes.                                                                                                                                                                                         |                    | PA at least twice a week for at least 20 minutes to maintain/improve physical fitness and muscle and bone strength. Stretching exercises at least twice a week for at least 10 minutes to maintain/improve flexibility. Regular exercise to maintain/improve balance. |                             |
| <b>Estonia</b>            | √                                               |                                                                                                                                                                                                                                                                                                                                                                                                                  | √                  | PA to enhance balance and coordination at least 2 twice a week.                                                                                                                                                                                                       | √                           |
| <b>Finland</b>            | √                                               |                                                                                                                                                                                                                                                                                                                                                                                                                  | √                  |                                                                                                                                                                                                                                                                       | √                           |
| <b>France</b>             |                                                 | At least 30 min of moderate PA per day, at least 5 times per week; or 15 min per day of high intensity PA, at least 5 times per week; or a combination of moderate and high intensity PA.                                                                                                                                                                                                                        | √                  | Activities to increase flexibility on 2 or more days a week.                                                                                                                                                                                                          | √                           |
| <b>Germany</b>            | √                                               |                                                                                                                                                                                                                                                                                                                                                                                                                  | √                  |                                                                                                                                                                                                                                                                       | √                           |
| <b>Greece</b>             |                                                 | At least 30 minutes/ day in bouts of at least 10 minutes duration.                                                                                                                                                                                                                                                                                                                                               | √                  | Exercises for improving balance and coordination at least 2 times/week.                                                                                                                                                                                               | √                           |
| <b>Ireland</b>            |                                                 | At least 30 minutes on five day a week, or 150 minutes/week                                                                                                                                                                                                                                                                                                                                                      |                    | Focus on aerobic activity, muscle-strengthening and balance (2-3 days/week).                                                                                                                                                                                          |                             |
| <b>Latvia</b>             | √                                               |                                                                                                                                                                                                                                                                                                                                                                                                                  | √                  |                                                                                                                                                                                                                                                                       |                             |
| <b>Lithuania</b>          |                                                 | At least 30 minutes of moderate-intensity PA every day in bouts of at least 10 minutes duration. As an alternative it can be recommended to no less than 10-15 minutes of high-intensity PA daily (at least 75 minutes per week) or appropriate combination of moderate-and high-intensity PA.                                                                                                                   | √                  |                                                                                                                                                                                                                                                                       | √                           |
| <b>Luxembourg</b>         | √                                               |                                                                                                                                                                                                                                                                                                                                                                                                                  | √                  |                                                                                                                                                                                                                                                                       |                             |
| <b>Malta</b>              |                                                 | At least 30 minutes of moderate-intensity PA on 5 days per week, or 20 minutes of vigorous-intensity PA on 3 days per week, or an equivalent combination of moderate and vigorous-intensity PA                                                                                                                                                                                                                   | √                  | Additional activities that promote improved strength, coordination and balance are recommended.                                                                                                                                                                       |                             |
| <b>Netherlands</b>        | √                                               | Minimum bouts of PA can be less than 10 minutes                                                                                                                                                                                                                                                                                                                                                                  | √                  |                                                                                                                                                                                                                                                                       | √                           |
| <b>Slovenia</b>           | √                                               |                                                                                                                                                                                                                                                                                                                                                                                                                  | √                  |                                                                                                                                                                                                                                                                       |                             |
| <b>Spain</b>              | √                                               |                                                                                                                                                                                                                                                                                                                                                                                                                  |                    | Muscle strength and balance training at least 3 times/week                                                                                                                                                                                                            | √                           |
| <b>Sweden</b>             | √                                               |                                                                                                                                                                                                                                                                                                                                                                                                                  | √                  |                                                                                                                                                                                                                                                                       | √                           |
| <b>United Kingdom</b>     | √                                               |                                                                                                                                                                                                                                                                                                                                                                                                                  | √                  | Older adults at risk of falls should do balance and co-ordination trainings on at least 2 days a week.                                                                                                                                                                | √                           |

WHO: World Health Organization; PA: physical activity

**Table 5.** National physical activity recommendations for special populations in EU Member States.

| Countries          | Publication year            |                                  |                       |                          |                              |
|--------------------|-----------------------------|----------------------------------|-----------------------|--------------------------|------------------------------|
|                    | Parents with small children | Pregnant and breastfeeding women | Post-menopausal women | People with disabilities | People with chronic diseases |
| Austria            |                             | 2010                             |                       | 2010                     | 2010                         |
| Belgium (Flanders) |                             | 2017                             |                       |                          |                              |
| Denmark            |                             | 2011                             |                       | 2011                     | 2011                         |
| Finland            |                             | 2016                             |                       | n/a                      | n/a                          |
| France             |                             | 2016                             | 2016                  | 2016                     | 2016, 2017(cancer)           |
| Germany            |                             | 2016                             |                       |                          | 2016                         |
| Greece             |                             | n/a                              | n/a                   |                          |                              |
| Ireland            |                             |                                  |                       | 2009                     | 2009                         |
| Latvia             |                             | n/a                              |                       | n/a                      | n/a                          |
| Lithuania          | 2017                        | n/a                              |                       | n/a                      | n/a                          |
| Spain              |                             | 2015                             |                       |                          |                              |
| Sweden             |                             | 2011                             |                       | 2011                     | 2011                         |
| United Kingdom     |                             | 2017                             |                       | 2011                     |                              |

n/a = year of publication is not available

1  
2  
3  
4  
5  
6  
7  
8  
9  
10  
11  
12  
13  
14  
15  
16  
17  
18  
19  
20  
21  
22  
23  
24  
25  
26  
27  
28  
29  
30  
31  
32  
33  
34  
35  
36  
37  
38  
39  
40  
41  
42  
43  
44  
45  
46  
47  
48  
49  
50  
51  
52  
53  
54  
55  
56  
57  
58  
59  
60

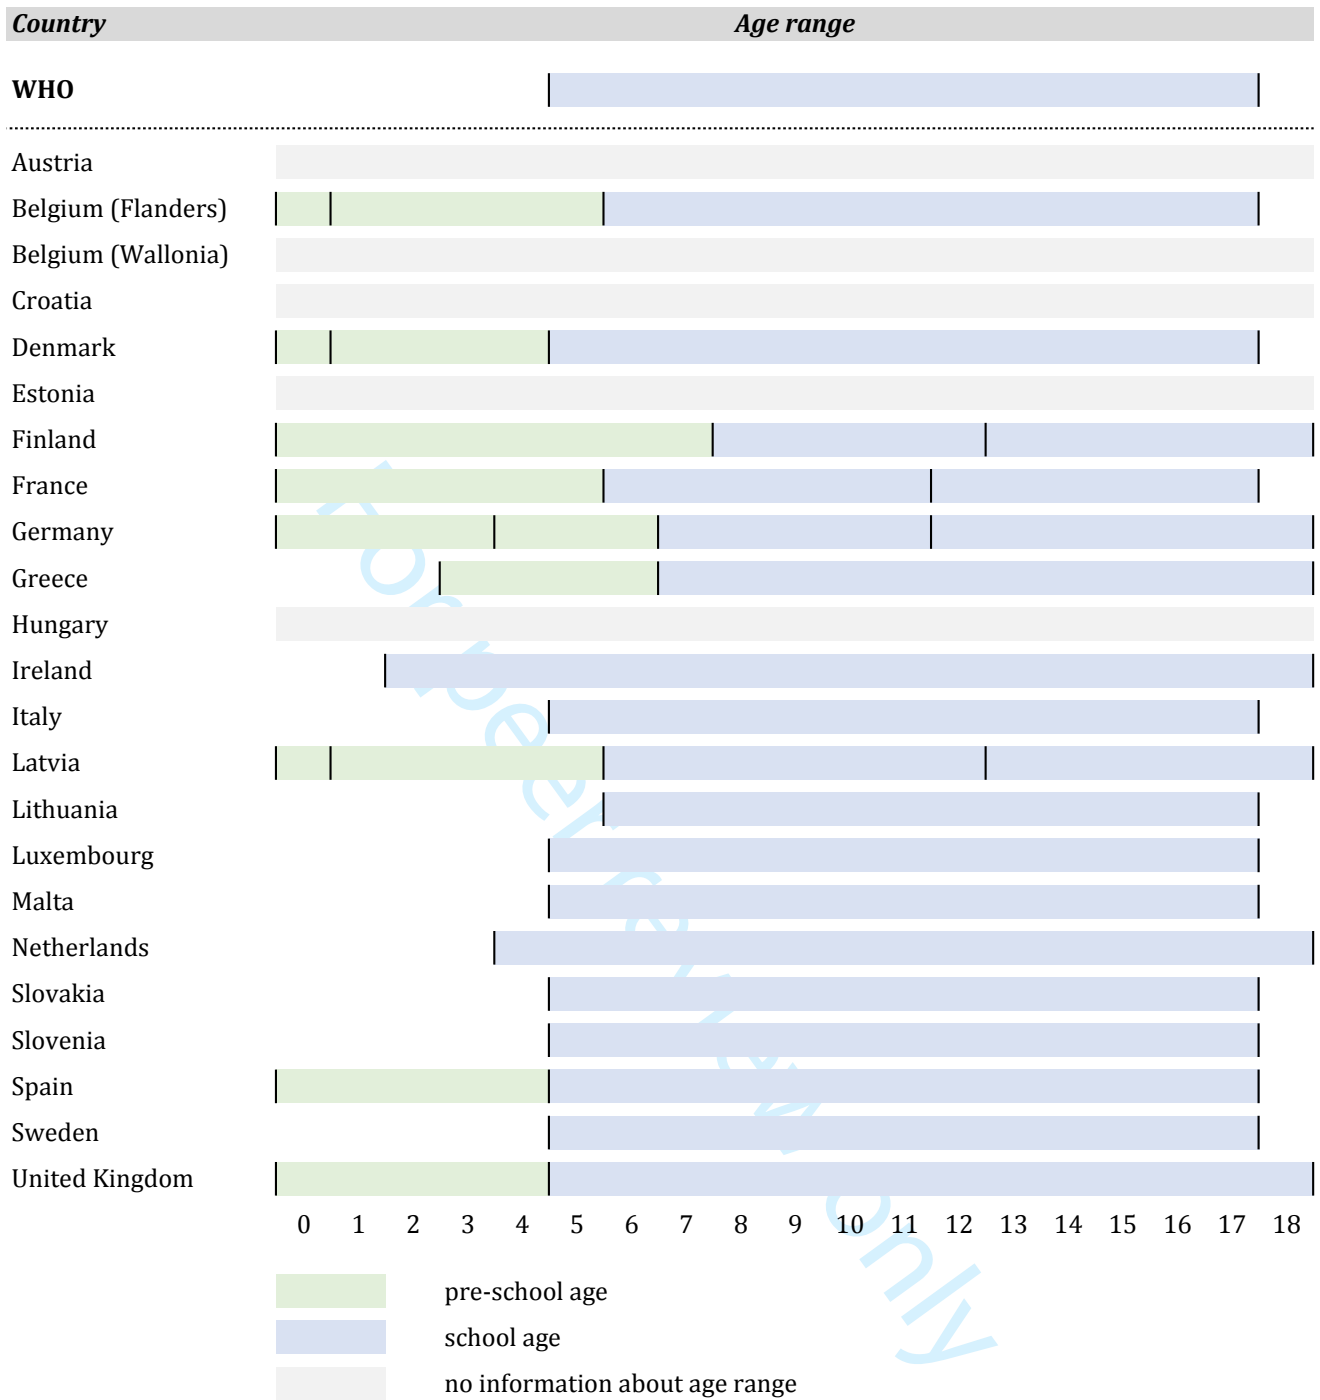

# BMJ Open

## Status and Contents of Physical Activity Recommendations in European Union Countries: A Systematic Comparative Analysis

|                                 |                                                                                                                                                                                                                                                                                                                                                                                                                                                                                                                                                                                                                                                                                                                                                     |
|---------------------------------|-----------------------------------------------------------------------------------------------------------------------------------------------------------------------------------------------------------------------------------------------------------------------------------------------------------------------------------------------------------------------------------------------------------------------------------------------------------------------------------------------------------------------------------------------------------------------------------------------------------------------------------------------------------------------------------------------------------------------------------------------------|
| Journal:                        | <i>BMJ Open</i>                                                                                                                                                                                                                                                                                                                                                                                                                                                                                                                                                                                                                                                                                                                                     |
| Manuscript ID                   | bmjopen-2019-034045.R1                                                                                                                                                                                                                                                                                                                                                                                                                                                                                                                                                                                                                                                                                                                              |
| Article Type:                   | Original research                                                                                                                                                                                                                                                                                                                                                                                                                                                                                                                                                                                                                                                                                                                                   |
| Date Submitted by the Author:   | 02-Dec-2019                                                                                                                                                                                                                                                                                                                                                                                                                                                                                                                                                                                                                                                                                                                                         |
| Complete List of Authors:       | Gelius, Peter; FAU, Department of Sport Science and Sport<br>Tcymbal, Antonina; FAU, Department of Sport Science and Sport<br>Abu-Omar, Karim ; FAU, Department of Sport Science and Sport<br>Mendes, Romeu; Universidade do Porto, EPIUnit – Instituto de Saúde<br>Pública<br>Tribuzi Morais, Sara; Universidade do Porto, Faculdade de Desporto<br>Whiting, Stephen; World Health Organization Regional Office for Europe,<br>Division of Noncommunicable Diseases and Promoting Health through<br>the Life-course ; Universidade do Porto, EPIUnit – Instituto de Saúde<br>Pública<br>Breda, Joao; World Health Organization Regional Office for Europe,<br>Division of Noncommunicable Diseases and Promoting Health through<br>the Life-course |
| <b>Primary Subject Heading</b>: | Public health                                                                                                                                                                                                                                                                                                                                                                                                                                                                                                                                                                                                                                                                                                                                       |
| Secondary Subject Heading:      | Health policy, Sports and exercise medicine                                                                                                                                                                                                                                                                                                                                                                                                                                                                                                                                                                                                                                                                                                         |
| Keywords:                       | Physical Activity, PUBLIC HEALTH, Health policy < HEALTH SERVICES<br>ADMINISTRATION & MANAGEMENT, National recommendations                                                                                                                                                                                                                                                                                                                                                                                                                                                                                                                                                                                                                          |
|                                 |                                                                                                                                                                                                                                                                                                                                                                                                                                                                                                                                                                                                                                                                                                                                                     |

SCHOLARONE™  
Manuscripts



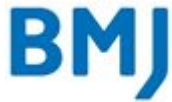

I, the Submitting Author has the right to grant and does grant on behalf of all authors of the Work (as defined in the below author licence), an exclusive licence and/or a non-exclusive licence for contributions from authors who are: i) UK Crown employees; ii) where BMJ has agreed a CC-BY licence shall apply, and/or iii) in accordance with the terms applicable for US Federal Government officers or employees acting as part of their official duties; on a worldwide, perpetual, irrevocable, royalty-free basis to BMJ Publishing Group Ltd ("BMJ") its licensees and where the relevant Journal is co-owned by BMJ to the co-owners of the Journal, to publish the Work in this journal and any other BMJ products and to exploit all rights, as set out in our [licence](#).

The Submitting Author accepts and understands that any supply made under these terms is made by BMJ to the Submitting Author unless you are acting as an employee on behalf of your employer or a postgraduate student of an affiliated institution which is paying any applicable article publishing charge ("APC") for Open Access articles. Where the Submitting Author wishes to make the Work available on an Open Access basis (and intends to pay the relevant APC), the terms of reuse of such Open Access shall be governed by a Creative Commons licence – details of these licences and which [Creative Commons](#) licence will apply to this Work are set out in our licence referred to above.

Other than as permitted in any relevant BMJ Author's Self Archiving Policies, I confirm this Work has not been accepted for publication elsewhere, is not being considered for publication elsewhere and does not duplicate material already published. I confirm all authors consent to publication of this Work and authorise the granting of this licence.

1  
2  
3 **1 Status and Contents of Physical Activity Recommendations in**  
4  
5  
6 **2 European Union Countries: A Systematic Comparative Analysis**  
7

8 *3 Peter Gelius<sup>1</sup>, Antonina Tcymbal<sup>1</sup>, Karim Abu-Omar<sup>1</sup>, Romeu Mendes<sup>2</sup>,*  
9  
10 *4 Sara Tribuzi Morais<sup>3</sup>, Stephen Whiting<sup>2, 4</sup>, & Joao Joaquim Breda<sup>4</sup>*  
11  
12

13  
14  
15  
16 <sup>1</sup>FAU Erlangen-Nürnberg, Department of Sport Science and Sport  
17

18 <sup>2</sup>EPIUnit – Instituto de Saúde Pública, Universidade de Porto  
19

20 <sup>3</sup>Universidade de Porto, Faculdade de Desporto  
21

22  
23 <sup>4</sup>World Health Organization Regional Office for Europe, Division of Noncommunicable  
24  
25 Diseases and Promoting Health through the Life-course  
26

27  
28 11

29  
30 12

31  
32  
33 Corresponding author:

34  
35 Dr Peter Gelius, e-mail: peter.gelius@fau.de  
36  
37  
38  
39  
40  
41  
42  
43  
44  
45  
46  
47  
48  
49  
50  
51  
52  
53  
54  
55  
56  
57  
58  
59  
60

1  
2  
3 1 **Abstract**

4  
5 2 **Objectives:** We analyzed the information on current national physical activity  
6  
7  
8 3 recommendations in all EU Member States provided by governments in a joint EU/WHO  
9  
10 4 survey on the implementation status of the EU Council Recommendation on Health-  
11  
12 5 Enhancing Physical Activity across Sectors.  
13  
14

15 6  
16  
17 7 **Design:** Cross-sectional survey.  
18  
19

20 8  
21  
22 9 **Participants:** The representatives of the 28 EU Member State governments to the EU  
23  
24 10 Physical Activity Focal Point Network.  
25  
26

27 11  
28  
29 12 **Outcome measures:** National recommendations on (a) minimum frequency, duration,  
30  
31 13 intensity and lengths of bouts of physical activity, on (b) preventing inactivity or  
32  
33 14 sedentary behavior, and (c) further recommendations for additional health benefits,  
34  
35 15 obesity prevention, and specific types of activity.  
36  
37

38 16  
39  
40 17 **Results:** An official document could be located for 23 of the 28 EU Member States, while  
41  
42 18 four are currently developing recommendations. For children and adolescents, most  
43  
44 19 countries follow the 2010 WHO Global Recommendations for Physical Activity, but there  
45  
46 20 are notable differences in the delimitation of age groups. 14 countries also followed  
47  
48 21 WHO in their recommendations for adults, and 11 countries have additional advice on  
49  
50 22 avoiding inactivity and sitting among adults. 18 Member States have recommendations  
51  
52 23 for older adults, twelve of which follow WHO. Thirteen countries also address at least  
53  
54 24 one special population (e.g. pregnant women, people with disabilities, and people with  
55  
56 25 chronic diseases), but the level of detail varies substantially between countries.  
57  
58  
59  
60

1  
2  
3 1 **Conclusions:** The large majority of EU Member States either has physical activity  
4  
5 2 recommendations in place or is in the process of developing them. There is a general  
6  
7 3 tendency to use the WHO Global Recommendations as a basis, with the greatest  
8  
9 4 variation observable for children and adolescents. Comparing results to a previous  
10  
11 5 round of data collection shows that the number of EU countries with physical activity  
12  
13 6 recommendations is increasing and that both special groups and sedentary behavior  
14  
15 7 have become more important in recent years.  
16  
17  
18  
19  
20  
21  
22  
23  
24  
25  
26  
27  
28  
29  
30  
31  
32  
33  
34  
35  
36  
37  
38  
39  
40  
41  
42  
43  
44  
45  
46  
47  
48  
49  
50  
51  
52  
53  
54  
55  
56  
57  
58  
59  
60

1  
2  
3 **1 Strengths and limitations of this study:**  
4

- 5  
6 2 • This is the first scientific analysis emanating from the 2018 round of data collection  
7  
8 3 to monitor the implementation of the EU Council Recommendation on Promoting  
9  
10 4 Health-Enhancing Physical Activity (HEPA) across Sectors.  
11  
12 5 • It builds on information obtained directly from national governments and gathered  
13  
14 6 jointly by the European Commission and the WHO Regional Office for Europe.  
15  
16 7 • The instrument used for data collection is based on the WHO Health-Enhancing  
17  
18 8 Physical Activity (HEPA Policy Audit Tool and is unique in providing comparable data  
19  
20 9 for all 28 EU countries.  
21  
22 10 • By comparing the data with an earlier survey using the same instrument, this study  
23  
24 11 also allows for monitoring the progress made in this area of health promotion policy  
25  
26 12 in recent years.  
27  
28 13 • Limitations include a restriction to documents published before April 2018,  
29  
30 14 difficulties in identifying and obtaining all relevant documents, and the language  
31  
32 15 barrier involved in analyzing data in 21 different languages.  
33  
34  
35  
36  
37  
38  
39  
40  
41  
42  
43  
44  
45  
46  
47  
48  
49  
50  
51  
52  
53  
54  
55  
56  
57  
58  
59  
60

## 1 **Introduction**

2 Global efforts to promote physical activity (PA) have intensified in recent years,  
3 culminating in key World Health Organization (WHO) publications such as the 2004  
4 WHO Global Strategy on Diet, PA and Health <sup>1</sup>, the PA Strategy for the WHO European  
5 Region 2016–2025 <sup>2</sup>, and the 2018 Global Action Plan on PA <sup>3</sup>. Common advice found in  
6 all these documents is for Member States to develop national recommendations on how  
7 active their population should be in order to promote health and prevent disease. WHO's  
8 2010 Global Recommendations on PA for Health<sup>4</sup>, which in turn draw extensively on the  
9 2008 PA Guidelines for Americans<sup>5</sup> and earlier work by organizations in the United  
10 States such as Centers for Disease Control and Prevention (CDC) and American College  
11 of Sports Medicine (ACSM)<sup>6</sup>, are often cited as a reference document for such  
12 recommendations. The European Union (EU) has also been increasingly active in the  
13 field, with efforts building upon the 2008 EU PA Guidelines<sup>7</sup> and the 2013 EU Council  
14 Recommendations for PA<sup>8</sup>. Like WHO, the EU encourages Member States to publish  
15 national PA recommendations for health.

16  
17 While there is only limited evidence that such national recommendations can, by  
18 themselves, increase the share of individuals who reach sufficient levels of PA <sup>9</sup>, the  
19 process of developing them may serve as a starting point for putting the topic of PA  
20 promotion on the national agenda <sup>10</sup>. Both academic publications on the subject<sup>10 11</sup> and  
21 actual guideline documents (including by WHO<sup>4</sup>, the EU<sup>12</sup>, and the US<sup>5 13</sup>) identify  
22 policy-makers and health promotion professionals as the main target audiences for  
23 national PA recommendations and emphasize that such guidelines may constitute a key  
24 information resource, guide national goal-setting and policy development, and serve as  
25 primary benchmarks for PA monitoring and surveillance initiatives.

1  
2  
3 1  
4  
5 2 Given both their political relevance and their potential to spark new policy, it is  
6  
7  
8 3 important to monitor whether national governments are making progress in developing  
9  
10 4 national PA recommendations. Guideline publications and updates by countries such as  
11  
12 5 the United States<sup>5 13</sup>, Canada<sup>14 15</sup>, and Australia<sup>16 17</sup> have received widespread attention.  
13  
14  
15 6 For the WHO European Region, Kahlmeier et al.<sup>11</sup> provided an overview of existing  
16  
17 7 national PA recommendations based on data collected in 2011. They found that 21 out  
18  
19 8 of the 53 nations in the entire Region and 16 out of the 28 EU Member States had such  
20  
21 9 recommendations in place. Some years later, Breda et al.<sup>18</sup> analyzed data collected in  
22  
23 10 2015 by the European Commission (EC) and the WHO Regional Office for Europe to  
24  
25 11 monitor the progress of implementation of the Council Recommendation on HEPA  
26  
27 12 across Sectors<sup>8</sup> and to produce the EU/WHO PA Country Factsheets for the EU Member  
28  
29 13 States of the WHO European Region<sup>19</sup>. They noted that 19 of the 27 participating EU  
30  
31 14 countries had reported national PA recommendations. However, a more detailed  
32  
33 15 analysis of these recommendations was beyond the scope of this overview article.  
34  
35  
36 16  
37  
38 17 As part of a regular update of this information<sup>19</sup>, WHO and the EC collected new  
39  
40 18 information on national PA recommendations in 2018. These data provide a unique  
41  
42 19 opportunity not only to revise the overview of existing recommendations in the EU but  
43  
44 20 also for a detailed comparison of target groups, age bracket definitions, and  
45  
46 21 recommended amounts and types of PA across nations. This information may be useful  
47  
48 22 both to further monitor the progress of recommendation development in the EU and as  
49  
50 23 a potential source of inspiration for other countries in the WHO European Region.  
51  
52  
53  
54  
55  
56  
57  
58  
59  
60

## 1 **Methods**

### 2 *Data collection*

3 Information about national PA recommendations was obtained from the 2018 joint  
4 survey by the EC and WHO Europe, which employed a questionnaire covering all 23  
5 indicators of the Council Recommendation on HEPA across Sectors. Indicator 1 is  
6 dedicated exclusively to national PA recommendations. Specific items included the  
7 development status of national PA recommendations (e.g. not planned, under  
8 development, formally adopted), the age groups covered (children and adolescents,  
9 adults or older adults), special populations addressed (e.g. children < 5 years, frail  
10 people or those aged  $\geq 85$  years, pregnant or breastfeeding women, people with  
11 disabilities or people with chronic diseases), and links to relevant documents <sup>19</sup>.

12  
13 The questionnaire was sent to the EU Physical Activity Focal Points in all 28 EU Member  
14 States in January 2018. Focal Points are PA experts officially nominated by their  
15 governments to support data collection who usually work in national ministries of  
16 health, ministries of sport, or related national agencies. They were asked to liaise with  
17 relevant national institutions and stakeholders to fill out the questionnaire within 3  
18 months. All 28 Focal Points completed the questionnaire. WHO reviewed the responses  
19 to ensure data quality, obtained additional information and clarification where  
20 necessary, and prepared draft summaries. After a final review by the Member States, the  
21 collated information was published in the form of updated PA Country Factsheets <sup>19</sup>.

### 22 23 *Verification of information on national physical activity recommendation*

24 For this article, we retrieved and reviewed the answers for Indicator 1 of the survey  
25 from the original dataset. We followed the links to national PA recommendations



1 provided by countries and downloaded the official documents. In cases where the link  
2 was missing or broken, an additional search was conducted on the internet. Where this  
3 still yielded no results, fellow academics from the field of PA in the respective nations  
4 were contacted to in order to obtain the document. The contents of recommendations in  
5 languages other than English or German were translated online via Google Translate.  
6 Translations were verified against the original versions by expert native speakers to  
7 confirm their factual correctness.

8

### 9 *Data analysis*

10 The following information were extracted from national PA recommendation  
11 documents: (i) minimum recommendations on frequency, duration, intensity and  
12 lengths of bouts of PA, (ii) recommendations on preventing inactivity or sedentary  
13 behavior (e.g. prolonged sitting), and (iii) any further PA recommendations for  
14 additional health benefits, obesity prevention, or specific types of PA. We extracted  
15 these data for all age brackets (children, adults, older adults) and special population  
16 groups (e.g. people with health-related conditions) listed in the respective document.  
17 Individual country results were then compared with the WHO Global Recommendations  
18 on PA for Health<sup>4</sup> and recommendations from the other EU Member States.

19

### 20 *Patient and Public Involvement*

21 No patient involved.

22

## 23 **Results**

24 An official document outlining national PA recommendations could be located for 23  
25 (82.1%) of the 28 EU Member States. For two countries, the official PA

1 recommendations did not contain any specific information about minimum  
 2 recommended PA levels. Four countries reported that they are in process of developing  
 3 PA recommendations, and one country reported there are currently no plans to develop  
 4 dedicated PA recommendations. Belgium has separate documents for the Flemish<sup>20</sup> and  
 5 Walloon<sup>21</sup> regions, both of which were included into analysis. In total, 22 documents (21  
 6 national documents plus an additional one for Belgium), published between 2008 and  
 7 2018, were analyzed in greater detail (Table 1).

8  
 9 **Table 1.** National physical activity recommendations in EU Member States, by year and  
 10 population group(s) covered  
 11

| Countries                        | Publication year         |        |              |                        |
|----------------------------------|--------------------------|--------|--------------|------------------------|
|                                  | Children/<br>adolescents | Adults | Older adults | Special<br>populations |
| Austria <sup>22</sup>            | 2010                     | 2010   | 2010         | 2010                   |
| Belgium (Flanders) <sup>20</sup> | 2017                     | 2017   | 2017         | 2017                   |
| Belgium (Wallonia) <sup>21</sup> | n/a                      | n/a    |              |                        |
| Bulgaria                         |                          |        |              |                        |
| Croatia <sup>23</sup>            | n/a                      | n/a    |              |                        |
| Cyprus                           |                          |        |              |                        |
| Czech Republic <sup>24</sup>     | 2015*                    | 2015*  | 2015*        |                        |
| Denmark <sup>25-30</sup>         | 2011, 2016               | 2011   | 2011         | 2011                   |
| Estonia <sup>31-33</sup>         | 2015                     | 2015   | 2015         |                        |
| Finland <sup>34-40</sup>         | 2008, 2016               | 2009   | 2008         | 2009, n/a              |
| France <sup>41-42</sup>          | 2016                     | 2016   | 2016         | 2016, 2017             |
| Germany <sup>43</sup>            | 2016                     | 2016   | 2016         | 2016                   |
| Greece <sup>44</sup>             | 2017                     | 2017   | 2017         | 2017                   |
| Hungary <sup>45</sup>            | 2011**                   |        |              |                        |
| Ireland <sup>46</sup>            | 2009                     | 2009   | 2009         | 2009                   |
| Italy <sup>47</sup>              | 2014                     | 2014   |              |                        |
| Latvia <sup>45</sup>             | n/a                      | n/a    | n/a          | n/a                    |
| Lithuania <sup>48-49</sup>       | n/a                      | n/a    | n/a          | 2017, n/a              |
| Luxembourg <sup>50</sup>         | 2016                     | 2016   | 2016         |                        |
| Malta <sup>51</sup>              | 2012                     | 2012   | 2012         |                        |
| Netherlands <sup>52</sup>        | 2017                     | 2017   | 2017         |                        |
| Poland                           |                          |        |              |                        |
| Portugal                         |                          |        |              |                        |
| Romania                          |                          |        |              |                        |
| Slovakia <sup>53</sup>           | 2017                     | 2017   |              |                        |
| Slovenia <sup>54</sup>           | 2015                     | 2015   | 2015         |                        |
| Spain <sup>55</sup>              | 2015                     | 2015   | 2015         | 2015                   |

|                                        |      |      |      |            |
|----------------------------------------|------|------|------|------------|
| <b>Sweden</b> <sup>56 57</sup>         | n/a  | 2011 | 2011 | 2011       |
| <b>United Kingdom</b> <sup>58 59</sup> | 2011 | 2011 | 2011 | 2011, 2017 |

*n/a = year of publication is not available*

*\* document does not include information about the duration, intensity and frequency of PA*

*\*\* document does not include information about the duration, intensity and frequency of PA but about daily mandatory PE in elementary and secondary schools*

## Children & Adolescents

Table 2 presents a detailed overview of existing PA recommendations for children and adolescents in EU Member States. For this target group, WHO recommends at least 60 minutes of moderate- to vigorous-intensity PA every day, adding that greater amounts will provide further health benefits <sup>4</sup>.

Regarding duration and frequency of PA, all recommendations suggest the same minimum as WHO, i.e. 60 minutes per day. The two exceptions are Germany <sup>43</sup>, which calls for at least 90 minutes, and Finland <sup>34</sup>, which stipulates 90–120 minutes per day for children (7–12 years) and 60–90 minutes per day for adolescents (13–18 years). 11 countries mention that any amount exceeding minimum recommendations will provide additional health benefits. Lithuania suggests that, to achieve additional health benefits, “PA time must be longer than the minimum (60 minutes) and last for at least 1.5–2 hours (120 minutes) daily” <sup>48</sup>. Like WHO, 16 countries specify the intensity of recommended PA as moderate to vigorous.

As additional aspects, WHO emphasizes that most of the daily PA should be aerobic and that vigorous-intensity activities should be incorporated at least three times per week to strengthen muscle and bone <sup>4</sup>. Recommendations in 14 EU Member States mirror this, while Lithuania<sup>48</sup> advocates at least 2 times per week and Finland<sup>34</sup> proposes to do it every day. Germany mentions that, for children aged 6–11, “the large muscle groups should be subject to higher-intensity loading on two to three days a week in order to

1 improve strength and endurance, taking into account respective developmental stages”

2 <sup>43</sup>. Austria<sup>22</sup> and Denmark <sup>25</sup> additionally recommend to include activities to improve  
3 flexibility.

4  
5 Belgium (Flanders)<sup>20</sup>, Denmark<sup>25</sup>, Finland<sup>34</sup> and Lithuania<sup>48</sup> specify that minimum bouts  
6 of PA should be at least 10 minutes, while France<sup>41</sup> suggests at least 5 minutes for  
7 children from 6–11 years. Minimum duration is part of WHO’s recommendations for  
8 adults (see below) but not for children. Also transcending WHO recommendations, 15  
9 national documents include sections on avoiding extended periods of inactivity and  
10 sitting among children and adolescents.

11  
12 The results indicate notable differences in the handling of age subgroups among  
13 children and adolescents (see Figure 1): In 2019, WHO published dedicated PA  
14 recommendations for children under the age of 5 <sup>60</sup>, but at the time of data collection,  
15 WHO recommendations only addressed children aged 5 to 17. Six countries used exactly  
16 the same age range. Others had already developed additional recommendations for  
17 children younger than 5 (9 countries), or they had extended the age range of their  
18 recommendations to this group (2 countries). Seven countries (Belgium (Flanders) <sup>20</sup>,  
19 Finland <sup>36</sup>, France <sup>41</sup>, Germany<sup>43</sup>, Latvia<sup>45</sup>, Spain<sup>55</sup>, the United Kingdom<sup>58</sup>) recommend  
20 for children under 5 to be active for at least 180 minutes per day. Denmark <sup>28</sup> calls for as  
21 much PA “as possible”, while Greece<sup>44</sup> and Ireland<sup>46</sup> recommend the same amount as for  
22 older children, i.e. at least 60 minutes per day. In addition, 7 countries included 18 year-  
23 olds in their recommendations for adolescents, and 6 introduced multiple age brackets  
24 with specific recommendations.

1 **Table 2.** National PA recommendations for children and adolescents in comparison to WHO recommendations

| Country                   | Age group | Minimum duration, intensity and frequency of PA |                                                                                                                                            | Additional aspects |                                                                                                                                                                                                     | Reducing sitting/inactivity |
|---------------------------|-----------|-------------------------------------------------|--------------------------------------------------------------------------------------------------------------------------------------------|--------------------|-----------------------------------------------------------------------------------------------------------------------------------------------------------------------------------------------------|-----------------------------|
|                           |           | Same as WHO                                     | Differences to WHO                                                                                                                         | Same as WHO        | Differences to WHO                                                                                                                                                                                  |                             |
| <b>WHO</b>                | 5-17      |                                                 | At least 60 minutes of moderate- to vigorous-intensity physical activity daily. PA beyond minimum duration has additional health benefits. |                    | Most of the daily physical activity should be aerobic. Vigorous-intensity activities should be incorporated, including those that strengthen muscle and bone, at least 3 times per week             |                             |
| <b>Austria</b>            | n/s       | √                                               |                                                                                                                                            | √                  | Additional activities to improve coordination and flexibility are recommended                                                                                                                       | √                           |
| <b>Belgium (Flanders)</b> | <1        |                                                 | As much as possible, daily                                                                                                                 |                    | Give freedom of movement in accordance with their physical possibilities in safe environment                                                                                                        | √                           |
|                           | 1-5       |                                                 | At least 180 minutes/day, any type of intensity                                                                                            |                    | It is important for toddlers and preschoolers to encourage a variety of exercise activities, which also are tailored to their age and enjoyable.                                                    | √                           |
|                           | 6-17      | √                                               | Minimum bouts - at least 10 minutes                                                                                                        | √                  |                                                                                                                                                                                                     | √                           |
| <b>Belgium (Wallonia)</b> | n/s       | √                                               |                                                                                                                                            |                    | n/s                                                                                                                                                                                                 |                             |
| <b>Croatia</b>            | n/s       | √                                               |                                                                                                                                            |                    | n/s                                                                                                                                                                                                 |                             |
| <b>Denmark</b>            | <1        |                                                 | As much as possible, daily                                                                                                                 |                    | Maximize floor-based tummy time for infants when they are awake. Ensure that infants are physically active in various ways during the day. Ensure that infants can move freely as much as possible. |                             |
|                           | 1-4       |                                                 | As much as possible, daily                                                                                                                 |                    | Ensure that children are physically active in various ways during the day. Ensure that children can move freely as much as possible.                                                                | √                           |
|                           | 5-17      | √                                               | Minimum bouts - at least 10 minutes                                                                                                        | √                  | Vigorous-intensity activities that strengthen muscle and bone should last at least 30 minutes. Additional activities to improve flexibility are recommended.                                        |                             |
| <b>Estonia</b>            | n/s       | √                                               |                                                                                                                                            | √                  |                                                                                                                                                                                                     | √                           |
| <b>Finland</b>            | <8        |                                                 | At least 180 minutes/day<br>2 hours of activities with different levels of intensity and 1 hour vigorous PA                                |                    | Daily outdoor play should be ensured.                                                                                                                                                               | √                           |
|                           | 7-12      |                                                 | At least 1.5-2 hours/day<br>Minimum bouts - at least 10 minutes                                                                            | √                  | Vigorous-intensity PA should be performed daily                                                                                                                                                     | √                           |
|                           | 13-18     |                                                 | At least 1-1.5 hours/day<br>Minimum bouts - at least 10 minutes                                                                            | √                  | Vigorous-intensity PA should be performed daily                                                                                                                                                     | √                           |
| <b>France</b>             | <5        |                                                 | At least 180 minutes/day<br>Or 15 minutes/hour                                                                                             |                    | PA should include various motor activities based on the development of basic motor skills. The playfulness of the proposed activities should be in priority.                                        | √                           |
|                           | 6-11      | √                                               | Minimum bouts - at least 5 minutes                                                                                                         | √                  | Activities that strengthen muscle and bone should last at least 20 minutes (non-consecutive days)                                                                                                   | √                           |
|                           | 12-17     | √                                               |                                                                                                                                            |                    | Activities that strengthen muscle and bone should last at least 20 minutes (non-consecutive days)                                                                                                   | √                           |

2

1 Table 2 continued.

| Country        | Age group        | Minimum duration, intensity and frequency of PA |                                                            | Additional aspects |                                                                                                                                                                                                    | Reducing sitting/inactivity |
|----------------|------------------|-------------------------------------------------|------------------------------------------------------------|--------------------|----------------------------------------------------------------------------------------------------------------------------------------------------------------------------------------------------|-----------------------------|
|                |                  | Same as WHO                                     | Differences to WHO                                         | Same as WHO        | Differences to WHO                                                                                                                                                                                 |                             |
| Germany        | <3               |                                                 | As much as possible, daily                                 |                    | A safe environment must be ensured                                                                                                                                                                 | √                           |
|                | 4-6              |                                                 | At least 180 minutes/day                                   |                    | n/s                                                                                                                                                                                                | √                           |
|                | 6-11             |                                                 | At least 90 minutes/day, moderate to vigorous intensity PA |                    | The large muscle groups should be subject to higher-intensity loading on two to three days a week in order to improve strength and endurance, taking into account respective developmental stages. | √                           |
|                | 12-18            |                                                 | At least 90 minutes/day, moderate to vigorous intensity PA |                    | n/s                                                                                                                                                                                                | √                           |
| Greece         | 3-6              | √                                               |                                                            |                    | Encourage a variety of activities within the week. These activities should be both enjoyable and safe.                                                                                             | √                           |
|                | 7-18             | √                                               |                                                            |                    | n/s                                                                                                                                                                                                | √                           |
| Ireland        | 2-18             | √                                               |                                                            | √                  |                                                                                                                                                                                                    |                             |
| Italy          | 5-17             | √                                               |                                                            |                    | n/s                                                                                                                                                                                                | √                           |
| Latvia         | <1               |                                                 | As much as possible, daily                                 |                    | Important to encourage to be active, developing child's muscles and motor skills                                                                                                                   |                             |
|                | 1-5              |                                                 | At least 180 minutes/day                                   |                    | n/s                                                                                                                                                                                                | √                           |
|                | 5-12             | √                                               |                                                            | √                  |                                                                                                                                                                                                    | √                           |
|                | 12-18            | √                                               |                                                            | √                  | Activities that strengthen muscle and bone should last at least 20 minutes                                                                                                                         |                             |
| Lithuania      | 6-17             | √                                               |                                                            |                    | Vigorous intensity PA should be performed at least 2times/week                                                                                                                                     | √                           |
| Luxembourg     | 5-17             | √                                               |                                                            | √                  |                                                                                                                                                                                                    |                             |
| Malta          | 5-17             | √                                               |                                                            |                    | n/s                                                                                                                                                                                                |                             |
| Netherlands    | 4-18             | √                                               |                                                            | √                  |                                                                                                                                                                                                    | √                           |
| Slovakia       | 5-17             | √                                               |                                                            |                    | n/s                                                                                                                                                                                                |                             |
| Slovenia       | 5-17             | √                                               |                                                            | √                  |                                                                                                                                                                                                    |                             |
| Spain          | Not able to walk |                                                 | Promote physical activity several times a day              |                    | PA in safe environments, particularly through ground games or super-vised activities in the water (swimming pools or at home bath time)                                                            | √                           |
|                | <5, able to walk |                                                 | At least 180 minutes/day, all levels of intensity          |                    | Carry out activities and games that develop basic motor skills in different environments (at home, in the park, in the swimming pool, etc.)                                                        | √                           |
|                | 5-17             | √                                               |                                                            | √                  |                                                                                                                                                                                                    | √                           |
| Sweden         | 5-17             | √                                               |                                                            | √                  |                                                                                                                                                                                                    |                             |
| United Kingdom | <5               |                                                 | At least 180 minutes/day                                   |                    | PA should be encouraged from birth, particularly through floor-based play and water-based activities in safe environments.                                                                         | √                           |
|                | 5-18             | √                                               |                                                            | √                  |                                                                                                                                                                                                    | √                           |

2 n/s: not specified; WHO: World Health Organization; PA: physical activity

1  
2  
3 1 *[Figure 1 about here]*  
4 2  
5

6  
7 3 *Adults*  
8

9 4 A comparison of the 21 national PA recommendations for adults (18–64 years) with the  
10  
11 5 respective WHO recommendation is presented in Table 3. In general, WHO advises  
12  
13 6 adults to engage in at least 150 minutes of moderate-intensity aerobic PA throughout  
14  
15 7 the week, or at least 75 minutes of vigorous-intensity aerobic PA, or an equivalent  
16  
17 8 combination of moderate- and vigorous-intensity PA. PA should be performed in bouts  
18  
19 9 of at least 10 minutes. Additional benefits can be gained from increasing moderate PA to  
20  
21 10 300 minutes per week, by engaging in 150 minutes of vigorous PA, or through an  
22  
23 11 equivalent combination of both.  
24  
25  
26  
27  
28  
29

30 13 For 14 nations, recommendations on minimum duration, intensity and frequency of PA  
31  
32 14 are fully in line with WHO. Croatia<sup>23</sup>, Denmark<sup>26</sup>, France<sup>41</sup>, Greece<sup>44</sup>, Lithuania<sup>48</sup>, Malta<sup>51</sup>  
33  
34 15 and Belgium (Wallonia)<sup>21</sup> recommend 30 minutes of PA per day on 5 or more days per  
35  
36 16 week, probably echoing older recommendations published jointly by the American  
37  
38 17 College of Sports Medicine (ACSM) and the Centers for Disease Control and Prevention  
39  
40 18 (CDC) in 1995<sup>61</sup> and updated in 2007<sup>62</sup>. Like WHO, 14 countries recommend to count  
41  
42 19 only activities with a duration of at least 10 minutes, while France<sup>41</sup> and the  
43  
44 20 Netherlands<sup>52</sup> suggest that bouts less than 10 minutes may also be counted. Seven  
45  
46 21 countries mirror WHO's recommendations regarding additional health benefits, while 5  
47  
48 22 countries merely mention that health can be further improved by performing PA above  
49  
50 23 the recommended minimum.  
51  
52  
53  
54  
55  
56  
57  
58  
59  
60

1 France<sup>41</sup>, Ireland<sup>46</sup> and Lithuania<sup>48</sup> recommend increasing the PA to 60 minutes of  
2 moderate PA per day on at least 5 days per week, or to equivalent amount of vigorous  
3 PA in order to achieve additional health benefits.

4  
5 An additional aspect of the WHO recommendations are muscle-strengthening activities  
6 involving major muscle groups, which should be performed on 2 or more days of the  
7 week<sup>4</sup>. Sixteen of the EU Member States also urge their citizens to do this. France  
8 diverges slightly by stipulating that strength training should be performed 1–2 times per  
9 week, with 1–2 days' recovery time in between, and stretching at least 2–3 times per  
10 week<sup>41</sup>. Denmark<sup>26</sup> recommends to also add activities that increase flexibility. In  
11 addition, Ireland<sup>46</sup>, Malta<sup>51</sup> and the United Kingdom<sup>58</sup> have specific recommendations on  
12 reducing or maintaining body weight. Eleven countries also have additional  
13 recommendations on avoiding long periods of inactivity and sitting among adults.

14



1 **Table 3.** National PA recommendations for adults (18–64 years) in comparison to WHO recommendations

| Country                   | Minimum duration, intensity and frequency of PA |                                                                                                                                                                                                                                                                                                                                                 | Additional aspects |                                                                                                                                         | Reducing sitting/inactivity |
|---------------------------|-------------------------------------------------|-------------------------------------------------------------------------------------------------------------------------------------------------------------------------------------------------------------------------------------------------------------------------------------------------------------------------------------------------|--------------------|-----------------------------------------------------------------------------------------------------------------------------------------|-----------------------------|
|                           | Same as WHO                                     | Differences to WHO                                                                                                                                                                                                                                                                                                                              | Same as WHO        | Differences to WHO                                                                                                                      |                             |
| <b>WHO</b>                |                                                 | At least 150 minutes of moderate aerobic PA throughout the week, or 75 minutes of vigorous aerobic PA, or an equivalent combination of both. Bouts should be at least 10 minutes each. For additional health benefits, increase moderate PA to 300 minutes per week, or engage in 150 minutes of vigorous PA/an equivalent combination of both. |                    | Muscle-strengthening activities should be done involving major muscle groups on 2 or more days a week.                                  |                             |
| <b>Austria</b>            | √                                               |                                                                                                                                                                                                                                                                                                                                                 | √                  |                                                                                                                                         |                             |
| <b>Belgium (Flanders)</b> |                                                 | At least 150 minutes of moderate intensity PA per week should be performed 5 days and preferably all days of the week, at least 30 minutes per day. Or 75 minutes vigorous PA as best spread over e.g. 3 days of 25 minutes. Inactive adults over the age of 45 should consult a general practitioner before starting vigorous intensity PA.    | √                  |                                                                                                                                         | √                           |
| <b>Belgium (Wallonia)</b> |                                                 | At least 30 minutes/day                                                                                                                                                                                                                                                                                                                         |                    |                                                                                                                                         |                             |
| <b>Croatia</b>            |                                                 | At least 30 minutes/day of moderate intensity PA                                                                                                                                                                                                                                                                                                |                    | n/s                                                                                                                                     |                             |
| <b>Denmark</b>            |                                                 | PA for at least 30 minutes per day. The activity should be of moderate to high intensity and extend beyond the usual short-term daily activities. If the 30 minutes are divided, each activity should last at least 10 minutes.                                                                                                                 | √                  | High intensity training should last at least 20 minutes. Incorporate activities that increase bone strength and flexibility.            |                             |
| <b>Estonia</b>            | √                                               |                                                                                                                                                                                                                                                                                                                                                 | √                  |                                                                                                                                         | √                           |
| <b>Finland</b>            | √                                               |                                                                                                                                                                                                                                                                                                                                                 | √                  |                                                                                                                                         | √                           |
| <b>France</b>             |                                                 | At least 30 minutes/day at least 5 days per week moderate to vigorous intensity. Vigorous intensity PA is recommended in short-term (5–10 min) and repeated in the day (3–4 times).                                                                                                                                                             |                    | Strength training is recommended 1–2 times a week, with 1–2 days recover in between each session. Stretching at least 2–3 times a week. | √                           |
| <b>Germany</b>            | √                                               |                                                                                                                                                                                                                                                                                                                                                 | √                  |                                                                                                                                         | √                           |
| <b>Greece</b>             |                                                 | At least 30 minutes/day                                                                                                                                                                                                                                                                                                                         |                    | n/s                                                                                                                                     | √                           |
| <b>Ireland</b>            | √                                               |                                                                                                                                                                                                                                                                                                                                                 | √                  |                                                                                                                                         |                             |
| <b>Italy</b>              | √                                               |                                                                                                                                                                                                                                                                                                                                                 |                    | n/s                                                                                                                                     |                             |
| <b>Latvia</b>             | √                                               |                                                                                                                                                                                                                                                                                                                                                 | √                  |                                                                                                                                         |                             |
| <b>Lithuania</b>          |                                                 | At least 30 minutes of moderate-intensity PA every day in bouts of at least 10 minutes. As an alternative, no less than 15 minutes of high-intensity PA daily, or an appropriate combination of moderate- and high-intensity PA.                                                                                                                | √                  |                                                                                                                                         |                             |
| <b>Luxembourg</b>         | √                                               |                                                                                                                                                                                                                                                                                                                                                 | √                  |                                                                                                                                         |                             |
| <b>Malta</b>              |                                                 | At least 30 minutes of moderate-intensity physical activity 5 days per week; or 20 minutes of vigorous-intensity physical activity 3 days per week; or an equivalent combination of moderate and vigorous-intensity PA.                                                                                                                         | √                  |                                                                                                                                         |                             |
| <b>Netherlands</b>        | √                                               | Minimum bouts of PA can be less than 10 minutes                                                                                                                                                                                                                                                                                                 | √                  |                                                                                                                                         | √                           |
| <b>Slovakia</b>           | √                                               |                                                                                                                                                                                                                                                                                                                                                 |                    | n/s                                                                                                                                     |                             |
| <b>Slovenia</b>           | √                                               |                                                                                                                                                                                                                                                                                                                                                 | √                  |                                                                                                                                         | √                           |
| <b>Spain</b>              | √                                               |                                                                                                                                                                                                                                                                                                                                                 | √                  |                                                                                                                                         | √                           |
| <b>Sweden</b>             | √                                               |                                                                                                                                                                                                                                                                                                                                                 | √                  |                                                                                                                                         | √                           |
| <b>United Kingdom</b>     | √                                               |                                                                                                                                                                                                                                                                                                                                                 | √                  |                                                                                                                                         | √                           |

2 n/s: not specified; WHO: World Health Organization; PA: physical activity

1  
2  
3 1 *Older adults*  
4

5 2 Eighteen EU Member states have national PA recommendations for older people that  
6  
7 3 were available for analysis. The contents of these are shown in Table 4. WHO's basic  
8  
9 4 recommendations for older adults (65+), which are identical to those for adults aged  
10  
11 5 18–64 (see above), have been directly adopted by twelve. In the 6 other cases, the  
12  
13 6 original national recommendation for adults differs from that by WHO, but they also  
14  
15 7 follow the practice of carrying over these recommendations to older people. All  
16  
17 8 identified documents add that persons who cannot achieve minimum PA levels should  
18  
19 9 be as physically active as their abilities and conditions allow.  
20  
21  
22  
23  
24  
25

26 10  
27 11 WHO adds that older people should engage in muscle-strengthening involving major  
28  
29 12 muscle groups on 2 or more days a week, and that those with poor mobility should  
30  
31 13 perform PA to enhance balance and prevent falls on 3 or more days per week. In general,  
32  
33 14 all national documents also include these additional aspects. No country has specific  
34  
35 15 recommendations for older adults on reducing or maintaining weight, but 11 add  
36  
37 16 recommendations on avoiding long periods of inactivity and sitting.  
38  
39  
40  
41  
42  
43  
44  
45  
46  
47  
48  
49  
50  
51  
52  
53  
54  
55  
56  
57  
58  
59  
60

1 **Table 4.** National PA recommendations for older adults (65+ years) in comparison to WHO recommendations

| Country                   | Minimum duration, intensity and frequency of PA |                                                                                                                                                                                                                                                                                                                                                                                                                  | Additional aspects |                                                                                                                                                                                                                                                                       | Reducing sitting/inactivity |
|---------------------------|-------------------------------------------------|------------------------------------------------------------------------------------------------------------------------------------------------------------------------------------------------------------------------------------------------------------------------------------------------------------------------------------------------------------------------------------------------------------------|--------------------|-----------------------------------------------------------------------------------------------------------------------------------------------------------------------------------------------------------------------------------------------------------------------|-----------------------------|
|                           | Same as WHO                                     | Differences to WHO                                                                                                                                                                                                                                                                                                                                                                                               | Same as WHO        | Differences to WHO                                                                                                                                                                                                                                                    |                             |
| <b>WHO</b>                |                                                 | 150 minutes of moderate-intensity aerobic PA throughout the week, or at least 75 minutes of vigorous-intensity aerobic PA, or an equivalent combination of moderate- and vigorous-intensity PA. PA should be performed in bouts of at least 10 minutes. For additional health benefits, increase moderate PA to 300 minutes per week, or engage in 150 minutes of vigorous PA/an equivalent combination of both. |                    | Muscle-strengthening involving major muscle groups on 2 or more days a week. Older adults with poor mobility should perform PA to enhance balance and prevent falls on 3 or more days per week.                                                                       |                             |
| <b>Austria</b>            | √                                               |                                                                                                                                                                                                                                                                                                                                                                                                                  | √                  |                                                                                                                                                                                                                                                                       |                             |
| <b>Belgium (Flanders)</b> | √                                               |                                                                                                                                                                                                                                                                                                                                                                                                                  | √                  |                                                                                                                                                                                                                                                                       | √                           |
| <b>Denmark</b>            |                                                 | PA for at least 30 minutes per day. PA should be moderate to high intensity and should extend beyond the usual short-term daily activities. If the 30 minutes is divided, each activity should last at least 10 minutes.                                                                                                                                                                                         |                    | PA at least twice a week for at least 20 minutes to maintain/improve physical fitness and muscle and bone strength. Stretching exercises at least twice a week for at least 10 minutes to maintain/improve flexibility. Regular exercise to maintain/improve balance. |                             |
| <b>Estonia</b>            | √                                               |                                                                                                                                                                                                                                                                                                                                                                                                                  | √                  | PA to enhance balance and coordination at least 2 twice a week.                                                                                                                                                                                                       | √                           |
| <b>Finland</b>            | √                                               |                                                                                                                                                                                                                                                                                                                                                                                                                  | √                  |                                                                                                                                                                                                                                                                       | √                           |
| <b>France</b>             |                                                 | At least 30 min of moderate PA per day, at least 5 times per week; or 15 min per day of high intensity PA, at least 5 times per week; or a combination of moderate and high intensity PA.                                                                                                                                                                                                                        | √                  | Activities to increase flexibility on 2 or more days a week.                                                                                                                                                                                                          | √                           |
| <b>Germany</b>            | √                                               |                                                                                                                                                                                                                                                                                                                                                                                                                  | √                  |                                                                                                                                                                                                                                                                       | √                           |
| <b>Greece</b>             |                                                 | At least 30 minutes/ day in bouts of at least 10 minutes duration.                                                                                                                                                                                                                                                                                                                                               | √                  | Exercises for improving balance and coordination at least 2 times/week.                                                                                                                                                                                               | √                           |
| <b>Ireland</b>            |                                                 | At least 30 minutes on five day a week, or 150 minutes/week                                                                                                                                                                                                                                                                                                                                                      |                    | Focus on aerobic activity, muscle-strengthening and balance (2-3 days/week).                                                                                                                                                                                          |                             |
| <b>Latvia</b>             | √                                               |                                                                                                                                                                                                                                                                                                                                                                                                                  | √                  |                                                                                                                                                                                                                                                                       |                             |
| <b>Lithuania</b>          |                                                 | At least 30 minutes of moderate-intensity PA every day in bouts of at least 10 minutes duration. As an alternative it can be recommended to no less than 10-15 minutes of high-intensity PA daily (at least 75 minutes per week) or appropriate combination of moderate-and high-intensity PA.                                                                                                                   | √                  |                                                                                                                                                                                                                                                                       | √                           |
| <b>Luxembourg</b>         | √                                               |                                                                                                                                                                                                                                                                                                                                                                                                                  | √                  |                                                                                                                                                                                                                                                                       |                             |
| <b>Malta</b>              |                                                 | At least 30 minutes of moderate-intensity PA on 5 days per week, or 20 minutes of vigorous-intensity PA on 3 days per week, or an equivalent combination of moderate and vigorous-intensity PA                                                                                                                                                                                                                   | √                  | Additional activities that promote improved strength, coordination and balance are recommended.                                                                                                                                                                       |                             |
| <b>Netherlands</b>        | √                                               | Minimum bouts of PA can be less than 10 minutes                                                                                                                                                                                                                                                                                                                                                                  | √                  |                                                                                                                                                                                                                                                                       | √                           |
| <b>Slovenia</b>           | √                                               |                                                                                                                                                                                                                                                                                                                                                                                                                  | √                  |                                                                                                                                                                                                                                                                       |                             |
| <b>Spain</b>              | √                                               |                                                                                                                                                                                                                                                                                                                                                                                                                  |                    | Muscle strength and balance training at least 3 times/week                                                                                                                                                                                                            | √                           |
| <b>Sweden</b>             | √                                               |                                                                                                                                                                                                                                                                                                                                                                                                                  | √                  |                                                                                                                                                                                                                                                                       | √                           |
| <b>United Kingdom</b>     | √                                               |                                                                                                                                                                                                                                                                                                                                                                                                                  | √                  | Older adults at risk of falls should do balance and co-ordination trainings on at least 2 days a week.                                                                                                                                                                | √                           |

2 WHO: World Health Organization; PA: physical activity

1  
2  
3 1 *Special groups*  
4

5 2 As illustrated in Table 5, thirteen countries also have national PA recommendations for  
6  
7 3 at least one special population (e.g. frail people or those aged  $\geq 85$  years, pregnant or  
8  
9 4 breastfeeding women, people with disabilities or people with chronic diseases).  
10  
11 5 However, the level of detail of these recommendations varies significantly, as well as the  
12  
13 6 publication format: Finland published recommendations for all special groups as  
14  
15 7 separate documents, and Lithuania has a separate document for parents with small  
16  
17 8 children. All other countries mentioned special groups in the general document with  
18  
19 9 recommendations on PA. Twelve countries have recommendations for women during  
20  
21 10 pregnancy and breastfeeding. Most of these suggest that healthy women during  
22  
23 11 pregnancy and breastfeeding follow the same recommendations as for adults. Two  
24  
25 12 countries (France<sup>41</sup>, Lithuania<sup>49</sup>) have specific recommendations on duration, frequency  
26  
27 13 or intensity of PA during pregnancy. In addition, Lithuania<sup>49</sup> also addresses parents with  
28  
29 14 small children.  
30  
31  
32  
33  
34  
35  
36  
37

38 16 Special recommendations for disabled people are provided by 9 countries. These are  
39  
40 17 mostly identical to the general recommendations but also include the reservation that  
41  
42 18 they should be adapted to the level and structure of the disability and to physical  
43  
44 19 conditions. Finland<sup>37</sup> has specific recommendations for three types of disability: adults  
45  
46 20 with a disease or disability that causes some difficulty in movement; adults who use an  
47  
48 21 assistive device for walking; and adults who use wheelchairs. Sweden<sup>56</sup> also specifically  
49  
50 22 mention that children and adolescences with disabilities should try to reach PA levels  
51  
52 23 recommended for their age under the supervision of a health professional.  
53  
54  
55  
56  
57  
58  
59  
60

1  
2  
3 1 Nine countries (Austria<sup>22</sup>, Denmark<sup>27</sup>, Finland<sup>37</sup>, France<sup>41</sup>, Germany<sup>43</sup>, Ireland<sup>46</sup>,  
4  
5 2 Latvia<sup>45</sup>, Lithuania<sup>48</sup> and Sweden<sup>57</sup>) have separate recommendations for people with  
6  
7 3 chronic diseases, generally encouraging them to be as active as is recommended for the  
8  
9 4 general population of their age. Latvia<sup>45</sup> and Lithuania<sup>48</sup> additionally recommend to seek  
10  
11 5 medical advice before starting to exercise. France<sup>41</sup> developed a special  
12  
13 6 recommendation on PA for people with cancer<sup>42</sup>.  
14  
15  
16  
17  
18

19 8 Two countries (France<sup>41</sup> and Greece<sup>44</sup>) have recommendations for postmenopausal  
20  
21 9 women, and 6 countries reported that they have special recommendations for very  
22  
23 10 elderly adults (85+). However, no specific documents for this adult group could be  
24  
25 11 identified in the context of this study.  
26  
27  
28  
29  
30  
31

32 13 **Table 5.** National physical activity recommendations for special populations in EU Member  
33 14 States.

| Countries          | Publication year            |                                  |                       |                          |                              |
|--------------------|-----------------------------|----------------------------------|-----------------------|--------------------------|------------------------------|
|                    | Parents with small children | Pregnant and breastfeeding women | Post-menopausal women | People with disabilities | People with chronic diseases |
| Austria            |                             | 2010                             |                       | 2010                     | 2010                         |
| Belgium (Flanders) |                             | 2017                             |                       |                          |                              |
| Denmark            |                             | 2011                             |                       | 2011                     | 2011                         |
| Finland            |                             | 2016                             |                       | n/a                      | n/a                          |
| France             |                             | 2016                             | 2016                  | 2016                     | 2016, 2017(cancer)           |
| Germany            |                             | 2016                             |                       |                          | 2016                         |
| Greece             |                             | 2017                             | 2017                  |                          |                              |
| Ireland            |                             |                                  |                       | 2009                     | 2009                         |
| Latvia             |                             | n/a                              |                       | n/a                      | n/a                          |
| Lithuania          | 2017                        | n/a                              |                       | n/a                      | n/a                          |
| Spain              |                             | 2015                             |                       |                          |                              |
| Sweden             |                             | 2011                             |                       | 2011                     | 2011                         |
| United Kingdom     |                             | 2017                             |                       | 2011                     |                              |

34  
35  
36  
37  
38  
39  
40  
41  
42  
43  
44  
45  
46  
47  
48  
49  
50  
51  
52  
53  
54 15 n/a = year of publication is not available  
55 16  
56  
57  
58 17  
59  
60 18

## 1 Discussion

2 This article has collected and analyzed data on national PA recommendations for EU  
3 Member States. Such an endeavor naturally comes with a number of limitations and  
4 potential caveats. First, the analysis is limited to documents published before April  
5 2018, and does not cover recommendations developed in several Member States since  
6 then. Examples include Hungary<sup>63</sup>, Italy<sup>64</sup>, Malta<sup>65</sup>, and the United Kingdom<sup>66</sup>.  
7 Likewise, important reference documents have received updates in the meantime or are  
8 about to do so, including the US Guidelines for Americans (2<sup>nd</sup> edition published in  
9 2018)<sup>13</sup>, the WHO recommendations for children under the age of 5 (published in  
10 2019)<sup>60</sup>, and the WHO Global Recommendations on Physical Activity in Youth, Adults  
11 and Older Adults (update to be published in 2020)<sup>67</sup>. Moreover, the visibility of national  
12 PA recommendations varies significantly, making some documents more difficult to  
13 identify and retrieve than others. While some recommendations are high-profile  
14 documents that are easily found on search engines, advertised on dedicated websites,  
15 and sport an official-looking layout, some others are hard to identify as government  
16 documents and exist only on national-language websites. In this context, there is  
17 obviously a bias towards countries whose native language is English and those that have  
18 chosen to publish supplementary English language versions of their recommendations.  
19 We have attempted to overcome this problem by relying both upon fellow PA  
20 researchers in the respective countries, the expertise of the WHO Regional Office for  
21 Europe and, where necessary, direct inquiry with the national PA Focal Points to ensure  
22 that all existing documents were reliably identified and obtained for our analysis.  
23  
24 The language barrier is always one of the greatest potential issues in a cross-country  
25 comparison, esp. when 21 different languages are involved as in this case. We worked to

1  
2  
3 1 solve this problem by using a combination of electronic translation and verification of  
4  
5 2 our initial translations by native speakers with a thorough background in PA promotion.  
6  
7 3 In our specific case, the issue was somewhat alleviated by the fact that most  
8  
9 4 recommendations were rather concise and did not use complicated language.  
10  
11  
12 5

13  
14  
15 6 All in all, we believe that our analysis, building on unique information obtained directly  
16  
17 7 from national governments obtained by the European Commission and WHO, provides  
18  
19 8 an excellent snapshot of existing PA recommendations in the EU, allowing us both to  
20  
21 9 assess the current situation in the Union and the progress made in the last years.  
22  
23

24 10  
25  
26 11 Our results show that the large majority of EU Member States currently either have  
27  
28 12 national PA recommendations in place or are in the process of developing them. In  
29  
30 13 addition, there is a general tendency for Member States (13 out of 20) to build their  
31  
32 14 recommendations on the 2010 WHO Global Recommendations<sup>4</sup> (and, by extension, the  
33  
34 15 PA Guidelines for Americans<sup>5</sup>). A minority of 7 countries based their recommendations  
35  
36 16 on other documents such as the slightly older CDC/ACSM recommendations<sup>62</sup>. Most of  
37  
38 17 the countries (except for Austria, Finland and Ireland) published their national PA  
39  
40 18 recommendations in the years after WHO global recommendations were released, but it  
41  
42 19 may have taken a while for these new recommendations to be universally known.  
43  
44  
45  
46  
47  
48  
49

50 21 Children and adolescents are arguably the age group with the greatest variation  
51  
52 22 between countries, especially regarding the number and range of age brackets for which  
53  
54 23 separate recommendations exist. At the time of data collection, WHO recommendations  
55  
56 24 started at the age of 5, but 10 countries had already added information for younger age  
57  
58 25 groups. This may underline the relevance of this group for national policy-making, but  
59  
60

1 also the fact that PA needs diverge substantially along the continuum between very  
2 young children and teenagers, and the evidence base for different age sub-groups is  
3 constantly expanding.

4  
5 Comparing our results to previous studies, we find that the number of countries in the  
6 EU with national PA recommendations has clearly increased over time, from 16 in 2011  
7 <sup>11</sup> via 19 in 2015 <sup>18</sup> to 23 in 2018. National PA recommendations for children and adults  
8 were available for 21 countries, which is almost twice as many as in 2011 (11 for  
9 children and 12 for adults <sup>11</sup>). This development is most clearly visible for older adults:  
10 In 2011, only 5 documents were available for analysis <sup>11</sup>; by 2018, this number had  
11 increased to 18.

12  
13 The analysis also showed that many countries have mentioned special population  
14 groups in their recommendations in recent years. More than half (12) of reviewed  
15 documents include recommendations for women during pregnancy and breastfeeding,  
16 and several countries (9) specified PA recommendations for people with chronic  
17 diseases. A few also (2) add recommendations for postmenopausal women. Special  
18 target groups seem to be a relatively new topic, as they do not appear in previous  
19 analyses of PA recommendations <sup>11 18</sup>.

20  
21 Finally, the number of countries which incorporated recommendations on avoiding  
22 prolonged periods of sitting or inactivity has also increased. In 2018, 13 countries had  
23 such recommendations for children, 11 for adults, and 10 for older adults. These figures  
24 had also been substantially lower in 2011, both for children and adolescents (4  
25 countries) as well as for adults and older adults (UK only) <sup>11</sup>.



1  
2  
3 1  
4  
5 2 By contrast, specific recommendations on reducing or maintaining body weight remain  
6  
7 relatively uncommon and are only mentioned the current PA recommendations of 3 EU  
8 3  
9 Member States.  
10 4  
11  
12 5  
13  
14

## 15 6 **Conclusion**

16  
17 7 This article has presented an overview of the current status of PA recommendations in  
18  
19 8 EU Member States. It can be viewed in the context of efforts by the European  
20  
21 9 Commission to monitor the progress of implementation of the Council Recommendation  
22  
23 10 on HEPA across Sectors and by WHO to build capacity for PA promotion in the European  
24  
25 11 Region. It also helps highlight current developments in the field (e.g. further  
26  
27 12 differentiation of age groups, needs of special populations, relevance of sedentary  
28  
29 13 behavior and weight management) and the extent to which new research evidence is  
30  
31 14 translated into policy development. Some of these new additions may also be reflected  
32  
33 15 in the planned update to the 2010 WHO Global Recommendations, work on which is due  
34  
35 16 to begin in the second half of 2019 <sup>67</sup>.  
36  
37  
38  
39  
40  
41  
42

43 18 Our findings may also help inspire policy development in other countries of the WHO  
44  
45 19 European Region, who may, for example, look to EU countries with comparable  
46  
47 20 population size, geography or PA culture in order to decide how to best adopt and adapt  
48  
49 21 basic WHO recommendations to their own national situation. In this context, it may also  
50  
51 22 be interesting to analyze in greater detail which processes, tools and stakeholders  
52  
53 23 countries used to draw up their national recommendations. Preliminary data from our  
54  
55 24 survey indicate that information on guideline development processes is currently  
56  
57 25 available for five of the 28 EU Member States. These countries used different  
58  
59  
60

1 combinations of approaches, including systematic literature reviews (three countries),  
2 expert consultation (four countries), and analysis/adaptation of existing  
3 recommendations issued by WHO or other national governments (four countries).  
4 However, further research would be needed to obtain more comprehensive information  
5 from all EU Member States and potentially make comparisons with other national  
6 guideline development processes around the world.

7  
8 From a scientific point of view, more research may be needed on the effectiveness of  
9 national PA recommendations, i.e. their direct impact on population-level PA behavior  
10 and the extent to which they guide (public) health professionals in their efforts to  
11 promote PA. A related question is to what extent national adaptations of basic WHO  
12 recommendations actually improve the effectiveness of PA promotion, and whether  
13 these effects justify the effort of developing country-specific recommendations.

14  
15 The EU Physical Activity Focal Points Network was instrumental both in collecting the  
16 data which this study is based and in fostering exchange between EU Member States on  
17 how to improve and harmonize PA promotion for all citizens of the Union. This analysis  
18 is therefore also testimony of the utility of international collaboration in health  
19 promotion, both between EU Member States as well as between the European  
20 Commission and WHO.

21  
22 **Acknowledgements:** We would like to thank the national representatives of the EU  
23 Physical Activity Focal Points Network for their support in collecting the data for this  
24 article. We would also like to thank Tuula Aira, Jacopo Cristini, Gregor Jurak, Susanna  
25 Kugelberg, Nemanja Lakicevic, Lorena Miranda, Paschalis-Odyseas Moysidis, Jana

1  
2  
3 1 Pelclova, Julia Soquet, and Nina Vischer for verifying specific details in national PA  
4  
5 2 recommendation documents that were published in languages not spoken by the  
6  
7  
8 3 authors.  
9

10 4  
11  
12 5 **Disclosure statement:** The writing group takes sole responsibility for the content of  
13  
14 6 this article and the content of this article reflects the views of the authors only. JB and  
15  
16 7 SW are staff members of the WHO. The authors alone are responsible for the views  
17  
18 8 expressed in this publication and they do not necessarily represent the decisions or the  
19  
20 9 stated policy of the World Health Organization.  
21  
22  
23

24 10  
25  
26 11 **Funding statement:** This research received no specific grant from any funding agency  
27  
28 12 in the public, commercial or not-for-profit sectors.  
29  
30  
31

32 13  
33 14 **Competing interests statement:** The authors declare that they have no competing  
34  
35 15 interests.  
36  
37  
38

39 16  
40 17 **Contributors:** PG, KAO and AT conceptualized the study. SW and RM developed the  
41  
42 18 survey questionnaire and collected the survey data. STM supported data management  
43  
44 19 during the survey. JRB and SW supervised the survey. PG, AT and KAO analyzed the  
45  
46 20 survey data. AT obtained and analyzed national recommendation documents. PG and  
47  
48 21 KAO collected additional information from experts and Physical Activity Focal Points. PG  
49  
50 22 drafted the manuscript. All authors participated in the revision of the article. All authors  
51  
52 23 contributed to and have approved the final manuscript.  
53  
54  
55  
56  
57  
58  
59  
60

1  
2  
3 1 **Data availability statement:** Data are available upon written request from the WHO  
4  
5 2 Regional Office for Europe, but written consent of the Physical Activity Focal Points of  
6  
7 3 involved countries, the European Commission, and the WHO Regional Office for Europe  
8  
9 4 may be required.  
10  
11  
12 5  
13  
14 6 **Ethics approval:** Ethical approval not required for the use of country-level policy data  
15  
16 7 as included in this study.  
17  
18  
19  
20  
21  
22  
23  
24  
25  
26  
27  
28  
29  
30  
31  
32  
33  
34  
35  
36  
37  
38  
39  
40  
41  
42  
43  
44  
45  
46  
47  
48  
49  
50  
51  
52  
53  
54  
55  
56  
57  
58  
59  
60

## 1 References

1. World Health Organisation. Global Strategy on Diet, Physical Activity and Health, 2004.
2. World Health Organisation. Physical activity strategy for the WHO European Region 2016-2025, 2015.
3. World Health Organisation. Global action plan on physical activity 2018–2030: more active people for a healthier world. Geneva, 2018.
4. World Health Organisation. Global Recommendations on Physical Activity for Health. Geneva, 2010.
5. U.S. Department of Health and Human Services. 2008 Physical Activity Guidelines for Americans. Be Active, Healthy, and Happy!, 2008.
6. Pate RR, Pratt M, Blair SN, et al. Physical activity and public health. A recommendation from the Centers for Disease Control and Prevention and the American College of Sports Medicine. *Jama* 1995;273(5):402-7. doi: 10.1001/jama.273.5.402 [published Online First: 1995/02/01]
7. European Commission. EU Physical Activity Guidelines. Recommended Policy Actions in Support of Health-Enhancing Physical Activity, 2008.
8. Council recommendation of 26 November 2013 on promoting health-enhancing physical activity across sectors. *Official Journal of the European Union* 2013;56:C 354/1 - /5.
9. Cameron C, Craig CL, Bull FC, et al. Canada's physical activity guides: has their release had an impact? *Canadian journal of public health = Revue canadienne de sante publique* 2007;98 Suppl 2:S161-9. [published Online First: 2008/01/25]
10. Rutten A, Abu-Omar K, Messing S, et al. How can the impact of national recommendations for physical activity be increased? Experiences from Germany. *Health research policy and systems* 2018;16(1):121. doi: 10.1186/s12961-018-0396-8 [published Online First: 2018/12/15]
11. Kahlmeier S, Wijnhoven TM, Alpiger P, et al. National physical activity recommendations: systematic overview and analysis of the situation in European countries. *BMC Public Health* 2015;15:133. doi: 10.1186/s12889-015-1412-3 [published Online First: 2015/04/17]
12. European Commission. Commission staff working document: A monitoring framework for the implementation of policies to promote healthenhancing physical activity (HEPA), based on the EU Physical Activity Guidelines. SWD(2013) 310 final. In: European Commission, ed. Brussels, 2013.
13. U.S. Department of Health and Human Services. Physical Activity Guidelines for Americans. 2nd edition. Washington, DC, 2018.
14. Tremblay MS, Warburton DE, Janssen I, et al. New Canadian physical activity guidelines. *Appl Physiol Nutr Metab* 2011;36(1):36-46; 47-58. doi: 10.1139/h11-009 [published Online First: 2011/02/18]
15. Tremblay MS, Chaput JP, Adamo KB, et al. Canadian 24-Hour Movement Guidelines for the Early Years (0-4 years): An Integration of Physical Activity, Sedentary Behaviour, and Sleep. *BMC Public Health* 2017;17(Suppl 5):874. doi: 10.1186/s12889-017-4859-6 [published Online First: 2017/12/09]
16. Bellew B, Schoeppe S, Bull FC, et al. The rise and fall of Australian physical activity policy 1996 - 2006: a national review framed in an international context. *Australia and New Zealand health policy* 2008;5:18. doi: 10.1186/1743-8462-5-18 [published Online First: 2008/08/01]
17. Department of Health. Australia's Physical Activity and Sedentary Behaviour Guidelines, 2014.

18. Breda J, Jakovljevic J, Rathmes G, et al. Promoting health-enhancing physical activity in Europe: Current state of surveillance, policy development and implementation. *Health Policy* 2018;122(5):519-27. doi: 10.1016/j.healthpol.2018.01.015 [published Online First: 2018/02/10]
19. World Health Organisation. Physical activity factsheets for the 28 European Union Member States of the WHO European Region. Copenhagen: WHO Regional Office for Europe 2018.
20. Vlaams Instituut Gezond Leven. Vlaamse gezondheidsaanbevelingen sedentair gedrag (lang stilzitten) en lichaamsbeweging [Flemish health recommendations on sedentary behaviour (long sitting) and physical activity]. Brussel: Vlaams Instituut Gezond Leven vzw 2017.
21. Plan Prévention et Promotion de la Santé en Wallonie [Plan for Prevention and Health Promotion in Wallonia].
22. Titze S, Ring-Dimitriou S, Schober PH, et al. Österreichische Empfehlungen für gesundheitswirksame Bewegung [Austrian recommendations for health-enhancing physical activity]. Wien: Fonds Gesundes Österreich 2010.
23. Hrvatski zavod za javno zdravstvo. Živjeti zdravo: tjelesno zdravlje [Healthy Living: Physical Health]. Zagreb.
24. Ministerstvo zdravotnictví. Zdraví 2020 Národní strategie ochrany a podpory zdraví a prevence nemocí. Akční plán č. 1: Podpora pohybové aktivity na období 2015-2020 [Health 2020 National strategy for the protection and promotion of Health and disease prevention. Action Plan 1: support for physical activity 2015-2020]: Ministerstvo zdravotnictví; 2015 [Available from: [http://www.mzcr.cz/Admin/\\_upload/files/5/ak%C4%8Dn%C3%AD%20pl%C3%A1ny%20-%20p%C5%99%C3%ADlohy/AP%2001%20podpora%20pohybov%C3%A9%20aktivita.pdf](http://www.mzcr.cz/Admin/_upload/files/5/ak%C4%8Dn%C3%AD%20pl%C3%A1ny%20-%20p%C5%99%C3%ADlohy/AP%2001%20podpora%20pohybov%C3%A9%20aktivita.pdf) accessed April 2019].
25. Danish Health Authority. Recommendations for children and adolescents (5-17 years old) Copenhagen2014 [Available from: <https://www.sst.dk/en/health-and-lifestyle/physical-activity/recommendations/recommendations-for-children-and-adolescents-> accessed March 2019].
26. Danish Health Authority. Recommendations for adults (18-64 years old) Copenhagen2014 [Available from: <https://www.sst.dk/en/health-and-lifestyle/physical-activity/recommendations/recommendations-for-adults> accessed March 2019].
27. Danish Health Authority. Recommendations for older people (65 years old and older) Copenhagen2014 [Available from: <https://www.sst.dk/en/health-and-lifestyle/physical-activity/recommendations/recommendations-for-older-people-> accessed March 2019].
28. Danish Health Authority. Recommendations for physical activity children 1–4 years old Copenhagen2016 [Available from: <https://www.sst.dk/en/health-and-lifestyle/~media/038D1AD667D14453BB02E3AAD26F9033.ashx> accessed March 2019].
29. Danish Health Authority. Recommendations for pregnant women Copenhagen2014 [Available from: <https://www.sst.dk/en/health-and-lifestyle/physical-activity/recommendations/pregnant-women> accessed March 2019].
30. Danish Health Authority. Recommendations for physical activity infants younger than 1 year old Copenhagen2016 [Available from: <https://www.sst.dk/en/health-and-lifestyle/~media/4D712D1E17794FCCA10B18B3BE8CD0DD.ashx> accessed March 2019].

- 1  
2  
3 1 31. Tervise Arengu Instituut. Kehalise aktiivsuse soovitused lastele ja noortele  
4 2 [Recommendations for physical activity for children and young people] 2015  
5 3 [Available from:  
6 4 [http://www.terviseinfo.ee/et/valdkonnad/liikumine/soovitused-](http://www.terviseinfo.ee/et/valdkonnad/liikumine/soovitused-liikumiseks/lastele-ja-noortele)  
7 5 [liikumiseks/lastele-ja-noortele](http://www.terviseinfo.ee/et/valdkonnad/liikumine/soovitused-liikumiseks/lastele-ja-noortele) accessed March 2019.  
8 6  
9 6 32. Tervise Arengu Instituut. Kehalise aktiivsuse soovitused täiskasvanutele  
10 7 [Recommendations for physical activity for adults] 2015 [Available from:  
11 8 [http://www.terviseinfo.ee/et/valdkonnad/liikumine/soovitused-](http://www.terviseinfo.ee/et/valdkonnad/liikumine/soovitused-liikumiseks/taiskasvanutele)  
12 9 [liikumiseks/taiskasvanutele](http://www.terviseinfo.ee/et/valdkonnad/liikumine/soovitused-liikumiseks/taiskasvanutele) accessed March 2019.  
13 10  
14 10 33. Tervise Arengu Instituut. Kehalise aktiivsuse soovitused eakatele [Recommendations  
15 11 for physical activity for the elderly] 2015 [Available from:  
16 12 [http://www.terviseinfo.ee/et/valdkonnad/liikumine/soovitused-](http://www.terviseinfo.ee/et/valdkonnad/liikumine/soovitused-liikumiseks/eakatele)  
17 13 [liikumiseks/eakatele](http://www.terviseinfo.ee/et/valdkonnad/liikumine/soovitused-liikumiseks/eakatele) accessed March 2019.  
18 14  
19 14 34. Recommendations for the physical activity of school-aged children. Helsinki: Ministry  
20 15 of education 2008.  
21 16 35. Reduce sedentary time – get healthier! National recommendations to reduce  
22 17 sedentary time. Helsinki: Ministry of social affairs and Health,, Finland, 2015.  
23 18 36. Finnish recommendations for physical activity in early childhood 2016. Joy, play and  
24 19 doing together.: Ministry of the Education and Culture, 2016.  
25 20 37. UKK Institute. Kolme soveltavaa liikuntapiirakkaa toimintakyvyn mukaan [Three  
26 21 suitable exercise pies according to persons movement ability] [Available from:  
27 22 [http://www.ukkinstituutti.fi/liikuntapiirakka/soveltavat\\_liikuntapiirakat](http://www.ukkinstituutti.fi/liikuntapiirakka/soveltavat_liikuntapiirakat)  
28 23 accessed March 2019.  
29 24  
30 24 38. UKK Institute. Terveysliikunnan suositus yli 65-vuotiaille [Physical activity  
31 25 recommendations for people over 65 years] 2008 [Available from:  
32 26 [http://www.ukkinstituutti.fi/filebank/2890-UKK-liikuntapiirakka-yli-65-v-](http://www.ukkinstituutti.fi/filebank/2890-UKK-liikuntapiirakka-yli-65-v-tulostettava.pdf)  
33 27 [tulostettava.pdf](http://www.ukkinstituutti.fi/filebank/2890-UKK-liikuntapiirakka-yli-65-v-tulostettava.pdf) accessed March 2019.  
34 28  
35 28 39. UKK Institute. Physical Activity Pie 2009 [Available from:  
36 29 [http://www.ukkinstituutti.fi/en/products-services/physical\\_activity\\_pie](http://www.ukkinstituutti.fi/en/products-services/physical_activity_pie)  
37 30 accessed March 2019.  
38 31  
39 31 40. UKK Institute. Physical exercise during and after pregnancy 2009 [Available from:  
40 32 <http://www.ukkinstituutti.fi/filebank/276-englanti.pdf> accessed March 2019.  
41 33  
42 34 41. Agence nationale de sécurité sanitaire de l'alimentation, de l'environnement et du  
43 35 travail,. Actualisation des repères du PNNS - Révisions des repères relatifs à  
44 36 l'activité physique et à la sédentarité [Revisions of benchmarks relating to physical  
45 37 activity and sedentary lifestyle]. Maisons-Alfort, 2016.  
46 38  
47 38 42. Istitut National du Cancer. Bénéfices de l'activité physique pendant et après cancer.  
48 39 Des connaissances scientifiques aux repères pratique [Benefits of physical activity  
49 40 during and after cancer. From scientific knowledge to practical benchmarks]:  
50 41 Istitut National du Cancer 2017.  
51 42  
52 42 43. Rütten A, Pfeifer K, editors. *National recommendations for physical activity and physical*  
53 43 *activity promotion*. Erlangen: FAU University Press, 2016.  
54 44  
55 44 44. The Institute of Preventive Medicine, Environmental and Occupational Health.  
56 45 Σωματική Δραστηριότητα, Συστάσεις [Physical activity recommendations]  
57 46 [Available from: <http://www.diatrofikoiodigoi.gr/?Page=systaseis> accessed  
58 47 March 2019.  
59 48  
60 47 45. 2011. évi CXCV. törvény a nemzeti köznevelésről [Law on national public education]:  
Nemzeti Jogszabálytár; 2011 [accessed April 2019].  
49 49  
50 49 46. Department of Health and Children, Health Service Executive. The National Guidelines  
on Physical Activity for Ireland, 2009.

- 1  
2  
3 1 47. Ministero della Salute. Informativa OMS: attività fisica [WHO information: physical  
4 2 activity], 2014.  
5 3  
6 3 48. Sveikatos mokymo ir ligų prevencijos centras. Fizinio aktyvumo rekomendacijos 3  
7 4 amžiaus grupėms [Physical activity recommendations for 3 age groups] Vilnius:  
8 5 Lietuvos Respublikos sveikatos apsaugos ministerija (Ministry of Health Republic  
9 6 of Lithuania); [Available from: <https://sam.lrv.lt/lt/veiklos-sritys/visuomenes-sveikatos-prieziura/mityba-ir-fizinis-aktyvumas-2/fizinis-aktyvumas-mytyba-ir-fizinis-aktyvumas/rekomendacijos> accessed March 2019.  
10 7  
11 8  
12 9 49. Zabolotnaja T, Zumeras R, Rimdeikienė I, et al. Tėvų su kūdikiais mankštos  
13 10 rekomendacijos [Physical activity recommendations for parents with babies],  
14 11 2017.  
15 12  
16 12 50. Ernährung und Bewegung [Nutrition and physical activity]: Ministère de la Santé  
17 13 (Ministerium für Gesundheit) 2016.  
18 14  
19 14 51. Superintendence of Public Health Ministry for Health, the Elderly and Community  
20 15 Care. A Healthy Weight for Life: A National Strategy for Malta 2012 - 2020. Msida:  
21 16 Superintendence of Public Health 2012.  
22 17 52. Health Council of the Netherlands. Physical activity guidelines 2017. The Hague:  
23 18 Health Council of the Netherlands 2017.  
24 19  
25 19 53. Národný akčný plán pre podporu pohybovej aktivity na roky 2017 - 2020 [National  
26 20 Action Plan to Support Physical Activity for 2017-2020]. Bratislava, 2017.  
27 21  
28 22 54. Resolucija o nacionalnem programu o prehrani in telesni dejavnosti za zdravje 2015–  
29 23 2025 [Resolution on the national programme on nutrition and physical activity for  
30 24 health 2015-2025], 2015.  
31 25  
32 25 55. Ministerio de Sanidad, Servicios Sociales e Igualdad,. Actividad Física para la Salud y  
33 26 Reducción del Sedentarismo. Recomendaciones para la población [Physical  
34 27 activity for health and reduction of sedentary lifestyle. Recommendations for the  
35 28 population]. Madrid: Ministerio de sanidad, servicios sociales e igualdad centro de  
36 29 publicaciones 2015.  
37 30  
38 31 56. Yrkesföreningar Fysisk Aktivitet. Hur mycket fysisk aktivitet behöver barn och  
39 32 ungdomar? [How much physical activity do children and young people need?:  
40 33 Yrkesföreningar Fysisk Aktivitet; [Available from:  
41 34 <http://www.fyss.se/rekommendationer-for-fysisk-aktivitet/for-barn-och-ungdomar/>  
42 35 accessed March 2019.  
43 36  
44 36 57. Yrkesföreningar för Fysisk Aktivitet. Rekommendationer om fysisk aktivitet för  
45 37 vuxna: Yrkesföreningar för Fysisk Aktivitet; 2011 [Available from:  
46 38 <http://www.yfa.se/rekommendationer-for-fysisk-aktivitet/> accessed March  
47 39 2019.  
48 40  
49 40 58. Department of Health, Physical Activity, Health Improvement and Protection. Start  
50 41 Active, Stay Active: A report on physical activity from the four home countries'  
51 42 Chief Medical Officers. London, 2011.  
52 43  
53 43 59. Department of Health and Social Care. Physical activity in pregnancy infographic  
54 44 London2017 [Available from:  
55 45 [https://assets.publishing.service.gov.uk/government/uploads/system/uploads/attachment\\_data/file/622336/CMO\\_physical\\_activity\\_pregnant\\_women\\_infographic.jpg](https://assets.publishing.service.gov.uk/government/uploads/system/uploads/attachment_data/file/622336/CMO_physical_activity_pregnant_women_infographic.jpg) accessed August 2019.  
56 46  
57 46 60. World Health Organisation. Guidelines on physical activity, sedentary behaviour and  
58 47 sleep for children under 5 years of age. Geneva: World Health Organisation 2019.  
59 48  
60 48 61. Pate RR, Pratt M, Blair S, et al. Physical activity and public health. A recommendation  
61 49 from the Centers for Disease Control and Prevention and the American College of  
62 50 Sports Medicine. *JAMA* 1995;273(5):402-07.



- 1  
2  
3 1 62. Haskell WL, Lee IM, Pate RR, et al. Physical activity and public health: updated  
4 2 recommendation for adults from the American College of Sports Medicine and the  
5 3 American Heart Association. *Med Sci Sports Exerc* 2007;39(8):1423-34.
- 6 4 63. Magyar Diáksport Szövetség [The Hungarian Student Sport Association]. Hivatalosan  
7 5 is elstartolt a DO60 mozgalom a HIPE 2018 – nemzetközi testnevelési  
8 6 konferencián #társak #játék [The DO60 movement at HIPE 2018 - international  
9 7 bodybuilding conference is officially started #people #game] 2018 [Available  
10 8 from: <http://www.mdsz.hu/hirek-hu/mdsz-hu-hu/2018/11/15/hivatalosan-is-elstartolt-a-do60-mozgalom-a-hipe-2018-nemzetkozi-testnevelesi-konferencian-tarsak-jatek/>  
11 9 accessed August 8 2019.
- 12 10  
13 11 64. De Mei B, Cadeddu C, Luzi P, et al., editors. *Movimento, sport e salute: l'importanza delle*  
14 12 *politiche di promozione dell'attività fisica e le ricadute sulla collettività [Movement,*  
15 13 *sport and health: the importance of policies to promote physical activity and the*  
16 14 *effects on the community]*. Roma: Istituto Superiore di Sanità, 2018.
- 17 15 65. Palamentary secretariat for youth, sport and voluntary organisations,. Aiming higher.  
18 16 An Overview of the National Strategy for Sport and Physical Activity in Malta 2019  
19 17 [
- 20 18 66. Foster C. Overview of the 2019 Physical Activity. Guidelines and implementation plans  
21 19 2018 [Available from:  
22 20 <http://www.fuse.ac.uk/media/sites/researchwebsites/fuse/Overview%20of%20the%202019%20Physical%20Guidelines%20and%20implementation%20plans%20-%20Charlie%20Foster.pdf>  
23 21 accessed August 2019.
- 24 22  
25 23 67. World Health Organisation. Call for Expression of Interest to participate in the WHO  
26 24 Guideline Development Group for the updating of the 2010 Global  
27 25 Recommendations on Physical Activity in Youth, Adults and Older Adults Geneva:  
28 26 World Health Organisation; 2019 [Available from:  
29 27 <https://www.who.int/ncds/prevention/physical-activity/update-global-recommendations-physical-activity/en/>  
30 28 accessed April 2019.
- 31 29  
32 30  
33  
34  
35  
36  
37  
38  
39  
40  
41  
42  
43  
44  
45  
46  
47  
48  
49  
50  
51  
52  
53  
54  
55  
56  
57  
58  
59  
60

1  
2 **Figure 1.** Comparison of age ranges in national PA recommendations for children and adolescents.  
3 WHO: World Health Organization.  
4  
5  
6  
7  
8  
9  
10  
11  
12  
13  
14  
15  
16  
17  
18  
19  
20  
21  
22  
23  
24  
25  
26  
27  
28  
29  
30  
31  
32  
33  
34  
35  
36  
37  
38  
39  
40  
41  
42  
43  
44  
45  
46  
47  
48  
49  
50  
51  
52  
53  
54  
55  
56  
57  
58  
59  
60

For peer review only

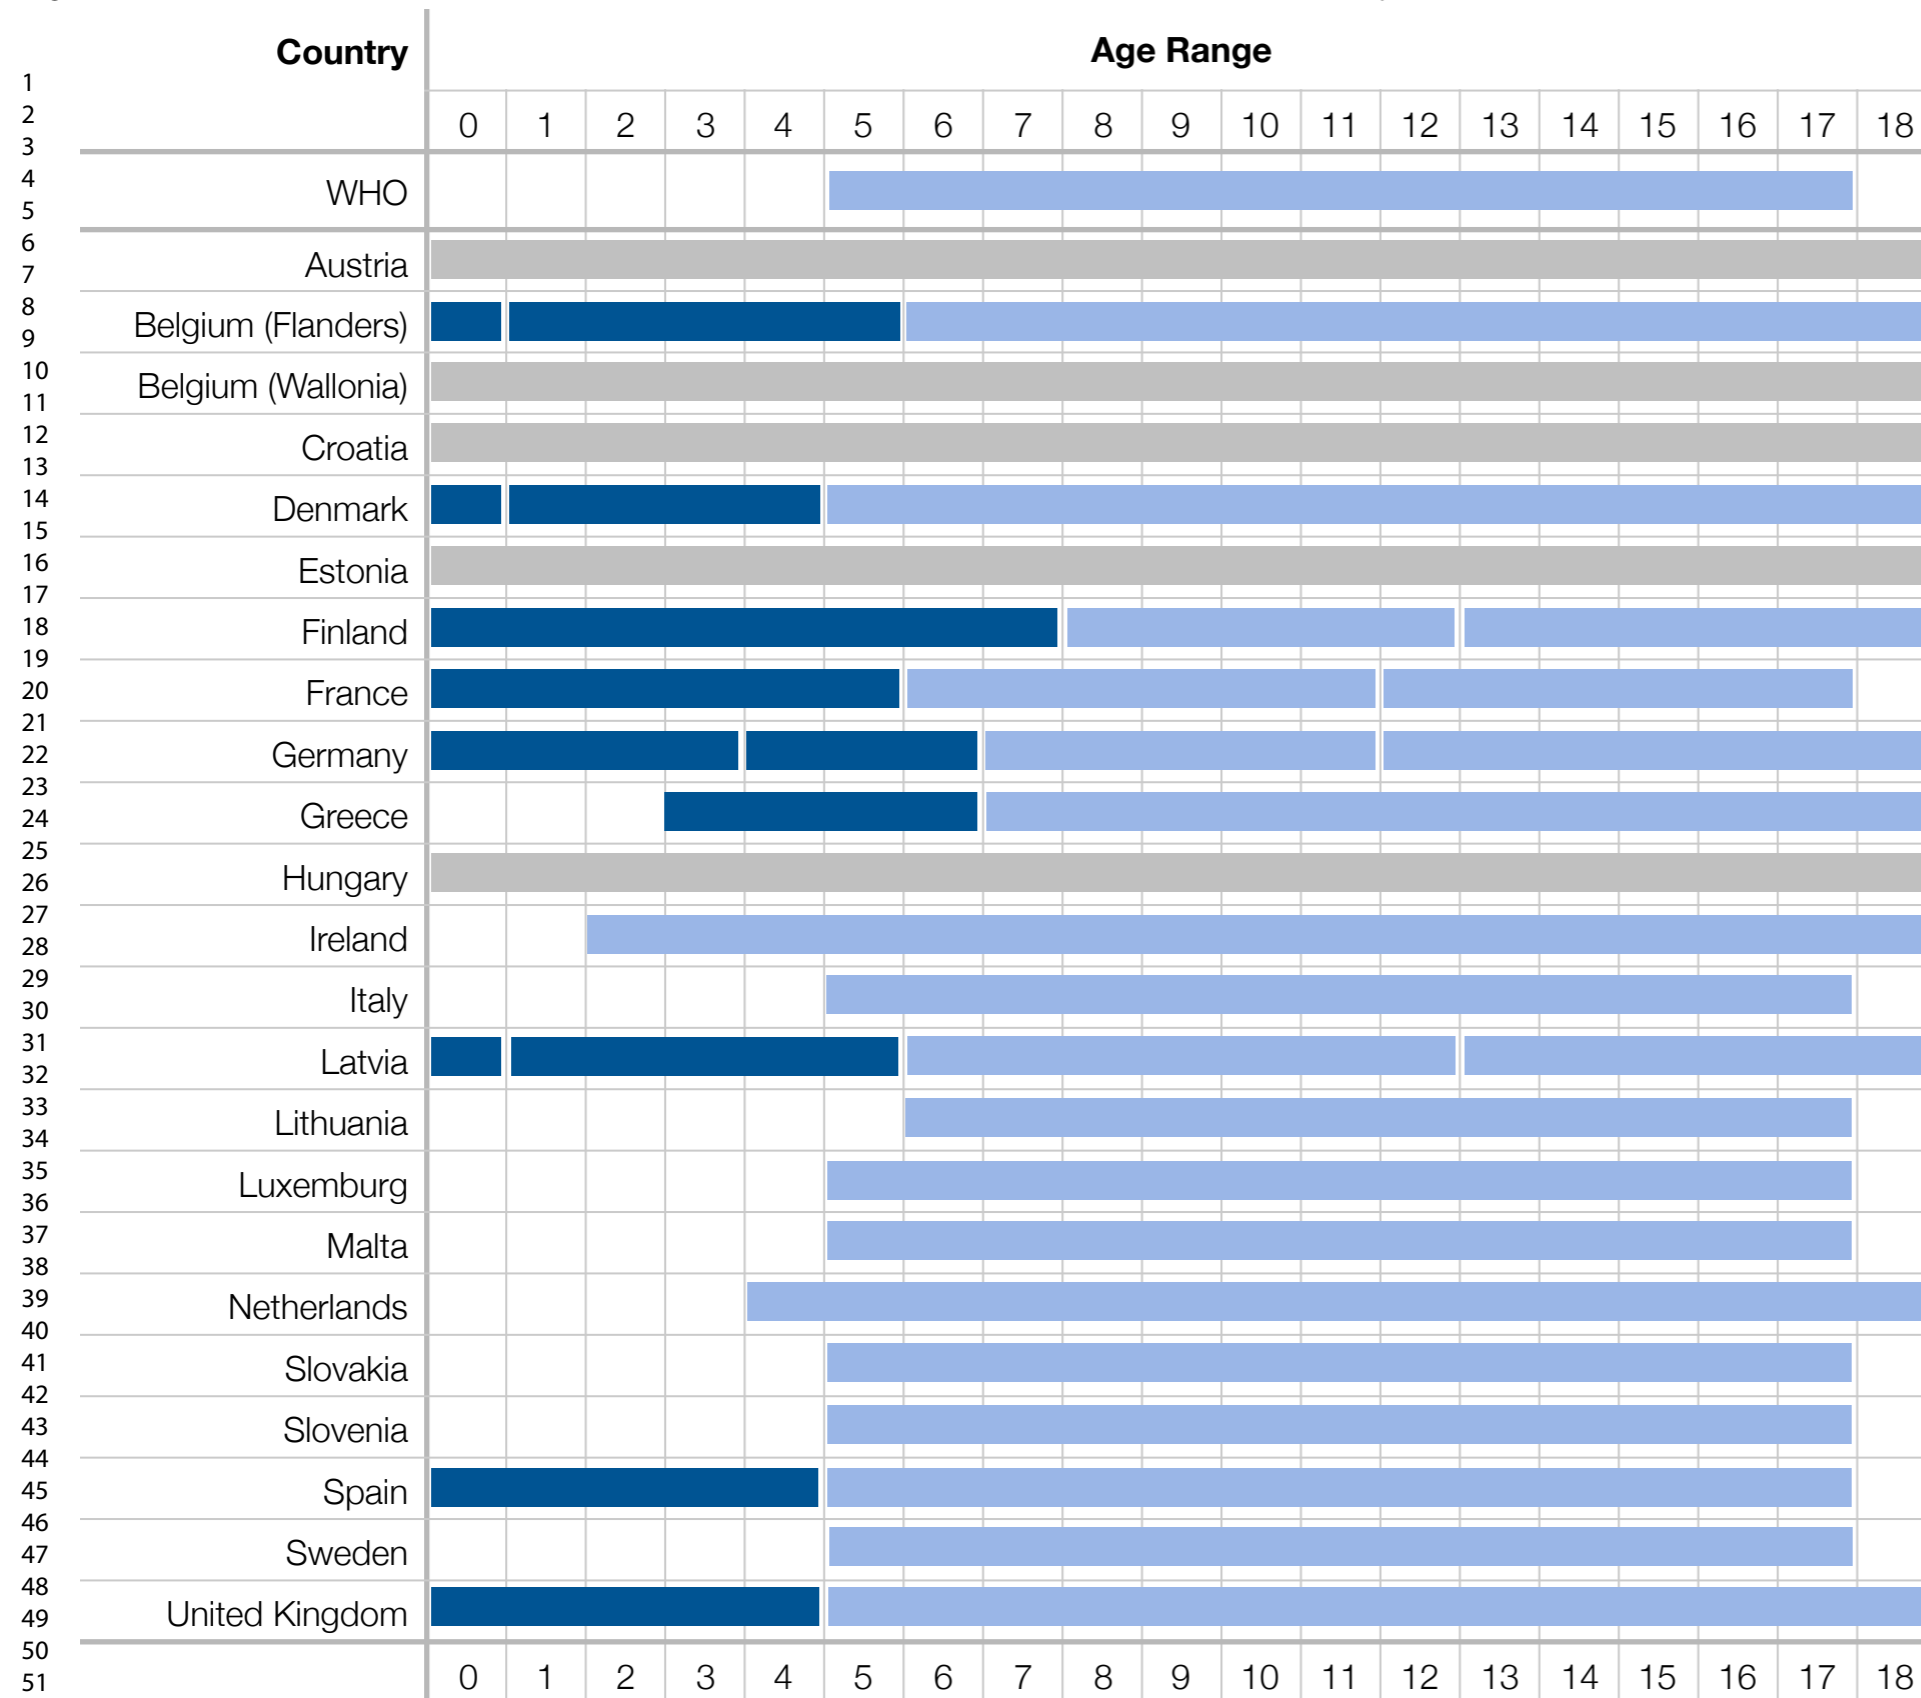

pre-school age  
 school age  
 no information about age range

**The RECORD statement – checklist of items, extended from the STROBE statement, that should be reported in observational studies using routinely collected health data.**

|                           | Item No. | STROBE items                                                                                                                                                                                                                   | Location in manuscript where items are reported                             | RECORD items                                                                                                                                                                                                                                                                                                                                                                                                                                | Location in manuscript where items are reported                                                  |
|---------------------------|----------|--------------------------------------------------------------------------------------------------------------------------------------------------------------------------------------------------------------------------------|-----------------------------------------------------------------------------|---------------------------------------------------------------------------------------------------------------------------------------------------------------------------------------------------------------------------------------------------------------------------------------------------------------------------------------------------------------------------------------------------------------------------------------------|--------------------------------------------------------------------------------------------------|
| <b>Title and abstract</b> |          |                                                                                                                                                                                                                                |                                                                             |                                                                                                                                                                                                                                                                                                                                                                                                                                             |                                                                                                  |
|                           | 1        | (a) Indicate the study's design with a commonly used term in the title or the abstract (b) Provide in the abstract an informative and balanced summary of what was done and what was found                                     | (a) Page 1, lines 1-2<br>Page 2, line 7<br><br>(b) Page 2, lines 2-5, 12-25 | RECORD 1.1: The type of data used should be specified in the title or abstract. When possible, the name of the databases used should be included.<br><br>RECORD 1.2: If applicable, the geographic region and timeframe within which the study took place should be reported in the title or abstract.<br><br>RECORD 1.3: If linkage between databases was conducted for the study, this should be clearly stated in the title or abstract. | Page 2, lines 2-5, 12-15<br><br>Page 1, line 2<br><br>No linkage between databases was conducted |
| <b>Introduction</b>       |          |                                                                                                                                                                                                                                |                                                                             |                                                                                                                                                                                                                                                                                                                                                                                                                                             |                                                                                                  |
| Background rationale      | 2        | Explain the scientific background and rationale for the investigation being reported                                                                                                                                           | Page 5, lines 1-25<br>Page 6, lines 1-15                                    |                                                                                                                                                                                                                                                                                                                                                                                                                                             |                                                                                                  |
| Objectives                | 3        | State specific objectives, including any prespecified hypotheses                                                                                                                                                               | Page 6, lines 17-23                                                         |                                                                                                                                                                                                                                                                                                                                                                                                                                             |                                                                                                  |
| <b>Methods</b>            |          |                                                                                                                                                                                                                                |                                                                             |                                                                                                                                                                                                                                                                                                                                                                                                                                             |                                                                                                  |
| Study Design              | 4        | Present key elements of study design early in the paper                                                                                                                                                                        | Page 7, lines 3-11                                                          |                                                                                                                                                                                                                                                                                                                                                                                                                                             |                                                                                                  |
| Setting                   | 5        | Describe the setting, locations, and relevant dates, including periods of recruitment, exposure, follow-up, and data collection                                                                                                | Page 7, lines 13-21                                                         |                                                                                                                                                                                                                                                                                                                                                                                                                                             |                                                                                                  |
| Participants              | 6        | (a) <i>Cohort study</i> - Give the eligibility criteria, and the sources and methods of selection of participants. Describe methods of follow-up<br><i>Case-control study</i> - Give the eligibility criteria, and the sources | (a) Page 7, lines 13-18<br>(Cross-sectional study)                          | RECORD 6.1: The methods of study population selection (such as codes or algorithms used to identify subjects) should be listed in detail. If this is not possible, an explanation should be provided.                                                                                                                                                                                                                                       | Page 7, lines 16-18                                                                              |

|                                                                               |                              |                                                                                                                                                                                                                                                                                                                                                                                                                                                                                           |                                                                                                                                                                                      |                                                                                                                                                                                                                                                                                                                                                                                                                                                                                         |                                                                                                                                                                                                                 |                     |
|-------------------------------------------------------------------------------|------------------------------|-------------------------------------------------------------------------------------------------------------------------------------------------------------------------------------------------------------------------------------------------------------------------------------------------------------------------------------------------------------------------------------------------------------------------------------------------------------------------------------------|--------------------------------------------------------------------------------------------------------------------------------------------------------------------------------------|-----------------------------------------------------------------------------------------------------------------------------------------------------------------------------------------------------------------------------------------------------------------------------------------------------------------------------------------------------------------------------------------------------------------------------------------------------------------------------------------|-----------------------------------------------------------------------------------------------------------------------------------------------------------------------------------------------------------------|---------------------|
| 1<br>2<br>3<br>4<br>5<br>6<br>7<br>8<br>9<br>10<br>11<br>12<br>13<br>14<br>15 |                              | <p>and methods of case ascertainment and control selection. Give the rationale for the choice of cases and controls</p> <p><i>Cross-sectional study</i> - Give the eligibility criteria, and the sources and methods of selection of participants</p> <p><i>(b) Cohort study</i> - For matched studies, give matching criteria and number of exposed and unexposed</p> <p><i>Case-control study</i> - For matched studies, give matching criteria and the number of controls per case</p> | (b) Does not apply                                                                                                                                                                   | <p>RECORD 6.2: Any validation studies of the codes or algorithms used to select the population should be referenced. If validation was conducted for this study and not published elsewhere, detailed methods and results should be provided.</p> <p>RECORD 6.3: If the study involved linkage of databases, consider use of a flow diagram or other graphical display to demonstrate the data linkage process, including the number of individuals with linked data at each stage.</p> | <p>Does not apply</p> <p>Does not apply</p>                                                                                                                                                                     |                     |
| 16<br>17<br>18<br>19<br>20<br>21                                              | Variables                    | 7                                                                                                                                                                                                                                                                                                                                                                                                                                                                                         | Clearly define all outcomes, exposures, predictors, potential confounders, and effect modifiers. Give diagnostic criteria, if applicable.                                            | Page 8, lines 10-16                                                                                                                                                                                                                                                                                                                                                                                                                                                                     | RECORD 7.1: A complete list of codes and algorithms used to classify exposures, outcomes, confounders, and effect modifiers should be provided. If these cannot be reported, an explanation should be provided. | Page 8, lines 17-18 |
| 22<br>23<br>24<br>25<br>26<br>27<br>28<br>29                                  | Data sources/<br>measurement | 8                                                                                                                                                                                                                                                                                                                                                                                                                                                                                         | For each variable of interest, give sources of data and details of methods of assessment (measurement). Describe comparability of assessment methods if there is more than one group | Page 7, lines 5-11                                                                                                                                                                                                                                                                                                                                                                                                                                                                      |                                                                                                                                                                                                                 |                     |
| 30<br>31                                                                      | Bias                         | 9                                                                                                                                                                                                                                                                                                                                                                                                                                                                                         | Describe any efforts to address potential sources of bias                                                                                                                            | Page 7, lines 18-25<br>Page 8, lines 1-7                                                                                                                                                                                                                                                                                                                                                                                                                                                |                                                                                                                                                                                                                 |                     |
| 32<br>33                                                                      | Study size                   | 10                                                                                                                                                                                                                                                                                                                                                                                                                                                                                        | Explain how the study size was arrived at                                                                                                                                            | Page 7, lines 13-21                                                                                                                                                                                                                                                                                                                                                                                                                                                                     |                                                                                                                                                                                                                 |                     |
| 34<br>35<br>36<br>37                                                          | Quantitative variables       | 11                                                                                                                                                                                                                                                                                                                                                                                                                                                                                        | Explain how quantitative variables were handled in the analyses. If applicable, describe which groupings were chosen, and why                                                        | Does not apply                                                                                                                                                                                                                                                                                                                                                                                                                                                                          |                                                                                                                                                                                                                 |                     |
| 38<br>39<br>40<br>41<br>42<br>43                                              | Statistical methods          | 12                                                                                                                                                                                                                                                                                                                                                                                                                                                                                        | <p>(a) Describe all statistical methods, including those used to control for confounding</p> <p>(b) Describe any methods used to examine subgroups and interactions</p>              | Does not apply                                                                                                                                                                                                                                                                                                                                                                                                                                                                          |                                                                                                                                                                                                                 |                     |

|    |                                  |                                                                                                               |                                                                                                                                                                                                                                                                                                                        |                                                                                                                                                                                                                           |                                                                                                                                                                                                                                                                                                                    |
|----|----------------------------------|---------------------------------------------------------------------------------------------------------------|------------------------------------------------------------------------------------------------------------------------------------------------------------------------------------------------------------------------------------------------------------------------------------------------------------------------|---------------------------------------------------------------------------------------------------------------------------------------------------------------------------------------------------------------------------|--------------------------------------------------------------------------------------------------------------------------------------------------------------------------------------------------------------------------------------------------------------------------------------------------------------------|
| 1  |                                  | (c) Explain how missing data were addressed                                                                   |                                                                                                                                                                                                                                                                                                                        |                                                                                                                                                                                                                           |                                                                                                                                                                                                                                                                                                                    |
| 2  |                                  | (d) <i>Cohort study</i> - If applicable, explain how loss to follow-up was addressed                          |                                                                                                                                                                                                                                                                                                                        |                                                                                                                                                                                                                           |                                                                                                                                                                                                                                                                                                                    |
| 3  |                                  | <i>Case-control study</i> - If applicable, explain how matching of cases and controls was addressed           |                                                                                                                                                                                                                                                                                                                        |                                                                                                                                                                                                                           |                                                                                                                                                                                                                                                                                                                    |
| 4  |                                  | <i>Cross-sectional study</i> - If applicable, describe analytical methods taking account of sampling strategy |                                                                                                                                                                                                                                                                                                                        |                                                                                                                                                                                                                           |                                                                                                                                                                                                                                                                                                                    |
| 5  |                                  | (e) Describe any sensitivity analyses                                                                         |                                                                                                                                                                                                                                                                                                                        |                                                                                                                                                                                                                           |                                                                                                                                                                                                                                                                                                                    |
| 6  |                                  |                                                                                                               |                                                                                                                                                                                                                                                                                                                        |                                                                                                                                                                                                                           |                                                                                                                                                                                                                                                                                                                    |
| 7  |                                  |                                                                                                               |                                                                                                                                                                                                                                                                                                                        |                                                                                                                                                                                                                           |                                                                                                                                                                                                                                                                                                                    |
| 8  |                                  |                                                                                                               |                                                                                                                                                                                                                                                                                                                        |                                                                                                                                                                                                                           |                                                                                                                                                                                                                                                                                                                    |
| 9  |                                  |                                                                                                               |                                                                                                                                                                                                                                                                                                                        |                                                                                                                                                                                                                           |                                                                                                                                                                                                                                                                                                                    |
| 10 |                                  |                                                                                                               |                                                                                                                                                                                                                                                                                                                        |                                                                                                                                                                                                                           |                                                                                                                                                                                                                                                                                                                    |
| 11 |                                  |                                                                                                               |                                                                                                                                                                                                                                                                                                                        |                                                                                                                                                                                                                           |                                                                                                                                                                                                                                                                                                                    |
| 12 |                                  |                                                                                                               |                                                                                                                                                                                                                                                                                                                        |                                                                                                                                                                                                                           |                                                                                                                                                                                                                                                                                                                    |
| 13 |                                  |                                                                                                               |                                                                                                                                                                                                                                                                                                                        |                                                                                                                                                                                                                           |                                                                                                                                                                                                                                                                                                                    |
| 14 | Data access and cleaning methods |                                                                                                               |                                                                                                                                                                                                                                                                                                                        | RECORD 12.1: Authors should describe the extent to which the investigators had access to the database population used to create the study population.                                                                     | Page 6, lines 17-18<br>Page 7, lines 3-5<br>Page 7, lines 13-21                                                                                                                                                                                                                                                    |
| 15 | ..                               |                                                                                                               |                                                                                                                                                                                                                                                                                                                        |                                                                                                                                                                                                                           |                                                                                                                                                                                                                                                                                                                    |
| 16 |                                  |                                                                                                               |                                                                                                                                                                                                                                                                                                                        |                                                                                                                                                                                                                           |                                                                                                                                                                                                                                                                                                                    |
| 17 |                                  |                                                                                                               |                                                                                                                                                                                                                                                                                                                        |                                                                                                                                                                                                                           |                                                                                                                                                                                                                                                                                                                    |
| 18 |                                  |                                                                                                               |                                                                                                                                                                                                                                                                                                                        |                                                                                                                                                                                                                           |                                                                                                                                                                                                                                                                                                                    |
| 19 |                                  |                                                                                                               |                                                                                                                                                                                                                                                                                                                        |                                                                                                                                                                                                                           |                                                                                                                                                                                                                                                                                                                    |
| 20 |                                  |                                                                                                               |                                                                                                                                                                                                                                                                                                                        | RECORD 12.2: Authors should provide information on the data cleaning methods used in the study.                                                                                                                           | Page 7, lines 23-25<br>Page 8, lines 1-7                                                                                                                                                                                                                                                                           |
| 21 |                                  |                                                                                                               |                                                                                                                                                                                                                                                                                                                        |                                                                                                                                                                                                                           |                                                                                                                                                                                                                                                                                                                    |
| 22 |                                  |                                                                                                               |                                                                                                                                                                                                                                                                                                                        |                                                                                                                                                                                                                           |                                                                                                                                                                                                                                                                                                                    |
| 23 |                                  |                                                                                                               |                                                                                                                                                                                                                                                                                                                        |                                                                                                                                                                                                                           |                                                                                                                                                                                                                                                                                                                    |
| 24 | Linkage                          | ..                                                                                                            |                                                                                                                                                                                                                                                                                                                        | RECORD 12.3: State whether the study included person-level, institutional-level, or other data linkage across two or more databases. The methods of linkage and methods of linkage quality evaluation should be provided. | Does not apply                                                                                                                                                                                                                                                                                                     |
| 25 |                                  |                                                                                                               |                                                                                                                                                                                                                                                                                                                        |                                                                                                                                                                                                                           |                                                                                                                                                                                                                                                                                                                    |
| 26 |                                  |                                                                                                               |                                                                                                                                                                                                                                                                                                                        |                                                                                                                                                                                                                           |                                                                                                                                                                                                                                                                                                                    |
| 27 |                                  |                                                                                                               |                                                                                                                                                                                                                                                                                                                        |                                                                                                                                                                                                                           |                                                                                                                                                                                                                                                                                                                    |
| 28 |                                  |                                                                                                               |                                                                                                                                                                                                                                                                                                                        |                                                                                                                                                                                                                           |                                                                                                                                                                                                                                                                                                                    |
| 29 |                                  |                                                                                                               |                                                                                                                                                                                                                                                                                                                        |                                                                                                                                                                                                                           |                                                                                                                                                                                                                                                                                                                    |
| 30 | <b>Results</b>                   |                                                                                                               |                                                                                                                                                                                                                                                                                                                        |                                                                                                                                                                                                                           |                                                                                                                                                                                                                                                                                                                    |
| 31 | Participants                     | 13                                                                                                            | (a) Report the numbers of individuals at each stage of the study ( <i>e.g.</i> , numbers potentially eligible, examined for eligibility, confirmed eligible, included in the study, completing follow-up, and analysed)<br>(b) Give reasons for non-participation at each stage.<br>(c) Consider use of a flow diagram | (a) Page 8, lines 24-25<br>Page 9, lines 5-6                                                                                                                                                                              | RECORD 13.1: Describe in detail the selection of the persons included in the study ( <i>i.e.</i> , study population selection) including filtering based on data quality, data availability and linkage. The selection of included persons can be described in the text and/or by means of the study flow diagram. |
| 32 |                                  |                                                                                                               |                                                                                                                                                                                                                                                                                                                        |                                                                                                                                                                                                                           | Page 8, lines 24-25<br>Page 9, lines 1-7                                                                                                                                                                                                                                                                           |
| 33 |                                  |                                                                                                               |                                                                                                                                                                                                                                                                                                                        |                                                                                                                                                                                                                           |                                                                                                                                                                                                                                                                                                                    |
| 34 |                                  |                                                                                                               |                                                                                                                                                                                                                                                                                                                        |                                                                                                                                                                                                                           |                                                                                                                                                                                                                                                                                                                    |
| 35 |                                  |                                                                                                               |                                                                                                                                                                                                                                                                                                                        |                                                                                                                                                                                                                           |                                                                                                                                                                                                                                                                                                                    |
| 36 |                                  |                                                                                                               |                                                                                                                                                                                                                                                                                                                        |                                                                                                                                                                                                                           |                                                                                                                                                                                                                                                                                                                    |
| 37 |                                  |                                                                                                               |                                                                                                                                                                                                                                                                                                                        |                                                                                                                                                                                                                           |                                                                                                                                                                                                                                                                                                                    |
| 38 |                                  |                                                                                                               |                                                                                                                                                                                                                                                                                                                        |                                                                                                                                                                                                                           |                                                                                                                                                                                                                                                                                                                    |
| 39 |                                  |                                                                                                               |                                                                                                                                                                                                                                                                                                                        |                                                                                                                                                                                                                           |                                                                                                                                                                                                                                                                                                                    |
| 40 |                                  |                                                                                                               |                                                                                                                                                                                                                                                                                                                        |                                                                                                                                                                                                                           |                                                                                                                                                                                                                                                                                                                    |
| 41 |                                  |                                                                                                               |                                                                                                                                                                                                                                                                                                                        |                                                                                                                                                                                                                           |                                                                                                                                                                                                                                                                                                                    |
| 42 | Descriptive data                 | 14                                                                                                            | (a) Give characteristics of study participants ( <i>e.g.</i> , demographic,                                                                                                                                                                                                                                            | (a) Does not apply                                                                                                                                                                                                        |                                                                                                                                                                                                                                                                                                                    |
| 43 |                                  |                                                                                                               |                                                                                                                                                                                                                                                                                                                        |                                                                                                                                                                                                                           |                                                                                                                                                                                                                                                                                                                    |
| 44 |                                  |                                                                                                               |                                                                                                                                                                                                                                                                                                                        |                                                                                                                                                                                                                           |                                                                                                                                                                                                                                                                                                                    |

1  
2  
3  
4  
5  
6  
7  
8  
9  
10  
11  
12  
13  
14  
15  
16  
17  
18  
19  
20  
21  
22  
23  
24  
25  
26  
27  
28  
29  
30  
31  
32  
33  
34  
35  
36  
37  
38  
39  
40  
41  
42  
43  
44  
45  
46  
47

|                   |    |                                                                                                                                                                                                                                                                                                                                                                                                                 |                                                                                                                                                               |                                                                                                                                                                                              |                                                  |
|-------------------|----|-----------------------------------------------------------------------------------------------------------------------------------------------------------------------------------------------------------------------------------------------------------------------------------------------------------------------------------------------------------------------------------------------------------------|---------------------------------------------------------------------------------------------------------------------------------------------------------------|----------------------------------------------------------------------------------------------------------------------------------------------------------------------------------------------|--------------------------------------------------|
|                   |    | clinical, social) and information on exposures and potential confounders<br>(b) Indicate the number of participants with missing data for each variable of interest<br>(c) <i>Cohort study</i> - summarise follow-up time (e.g., average and total amount)                                                                                                                                                      | (b) Page 8, lines 24-25<br>Page 9. Lines 1-4                                                                                                                  |                                                                                                                                                                                              |                                                  |
| Outcome data      | 15 | <i>Cohort study</i> - Report numbers of outcome events or summary measures over time<br><i>Case-control study</i> - Report numbers in each exposure category, or summary measures of exposure<br><i>Cross-sectional study</i> - Report numbers of outcome events or summary measures                                                                                                                            | Page 9, lines 5-7<br>(cross-sectional study)                                                                                                                  |                                                                                                                                                                                              |                                                  |
| Main results      | 16 | (a) Give unadjusted estimates and, if applicable, confounder-adjusted estimates and their precision (e.g., 95% confidence interval). Make clear which confounders were adjusted for and why they were included<br>(b) Report category boundaries when continuous variables were categorized<br>(c) If relevant, consider translating estimates of relative risk into absolute risk for a meaningful time period | Page 10, lines 7-27<br>Page 11, lines 1-25<br>Page 14, lines 3-23<br>Page 15, lines 1-13<br>Page 17, lines 1-16<br>Page 19, lines 1-23<br>Page 20, lines 1-11 |                                                                                                                                                                                              |                                                  |
| Other analyses    | 17 | Report other analyses done—e.g., analyses of subgroups and interactions, and sensitivity analyses                                                                                                                                                                                                                                                                                                               | Does not apply                                                                                                                                                |                                                                                                                                                                                              |                                                  |
| <b>Discussion</b> |    |                                                                                                                                                                                                                                                                                                                                                                                                                 |                                                                                                                                                               |                                                                                                                                                                                              |                                                  |
| Key results       | 18 | Summarise key results with reference to study objectives                                                                                                                                                                                                                                                                                                                                                        | Page 22, lines 11-25<br>Page 23, lines 1-3                                                                                                                    |                                                                                                                                                                                              |                                                  |
| Limitations       | 19 | Discuss limitations of the study, taking into account sources of potential bias or imprecision. Discuss both direction and magnitude of any potential bias                                                                                                                                                                                                                                                      | Page 21, lines 3-25<br>Page 22, lines 1-4                                                                                                                     | RECORD 19.1: Discuss the implications of using data that were not created or collected to answer the specific research question(s). Include discussion of misclassification bias, unmeasured | Page 21, lines 4-13, 25-25<br>Page 22, lines 1-4 |

|                                                           |    |                                                                                                                                                                            |                                            |                                                                                                                                                          |                    |
|-----------------------------------------------------------|----|----------------------------------------------------------------------------------------------------------------------------------------------------------------------------|--------------------------------------------|----------------------------------------------------------------------------------------------------------------------------------------------------------|--------------------|
|                                                           |    |                                                                                                                                                                            |                                            | confounding, missing data, and changing eligibility over time, as they pertain to the study being reported.                                              |                    |
| Interpretation                                            | 20 | Give a cautious overall interpretation of results considering objectives, limitations, multiplicity of analyses, results from similar studies, and other relevant evidence | Page 23, lines 5-25<br>Page 24, lines 1-4  |                                                                                                                                                          |                    |
| Generalisability                                          | 21 | Discuss the generalisability (external validity) of the study results                                                                                                      | Page 22, lines 6-9<br>Page 25, lines 15-20 |                                                                                                                                                          |                    |
| <b>Other Information</b>                                  |    |                                                                                                                                                                            |                                            |                                                                                                                                                          |                    |
| Funding                                                   | 22 | Give the source of funding and the role of the funders for the present study and, if applicable, for the original study on which the present article is based              | Page 26, lines 11-12                       |                                                                                                                                                          |                    |
| Accessibility of protocol, raw data, and programming code |    | ..                                                                                                                                                                         |                                            | RECORD 22.1: Authors should provide information on how to access any supplemental information such as the study protocol, raw data, or programming code. | Page 27, lines 1-4 |

\*Reference: Benchimol EI, Smeeth L, Guttman A, Harron K, Moher D, Petersen I, Sørensen HT, von Elm E, Langan SM, the RECORD Working Committee. The REporting of studies Conducted using Observational Routinely-collected health Data (RECORD) Statement. *PLoS Medicine* 2015; in press.

\*Checklist is protected under Creative Commons Attribution (CC BY) license.
